1 **Targeted insertion of reporter transgene into a gene safe harbor in human**  
2 **blood fluke, *Schistosoma mansoni***

3 **Wannaporn Ittiprasert<sup>1\*</sup>, Max F. Möscheid<sup>2</sup>, Cristian Chaparro<sup>3</sup>, Victoria H. Mann<sup>1</sup>,**  
4 **Thomas Quack<sup>2</sup>, Rutchanee Rodpai<sup>1,4</sup>, Andre´ Miller<sup>5</sup>, Prapakorn Wistiphongpun<sup>1,6</sup>,**  
5 **Watunyoo Buakaew<sup>1,7</sup>, Margaret Mentink-Kane<sup>5</sup>, Legendre´ Miller<sup>5</sup>, Sarah Schmid<sup>5</sup>,**  
6 **Anastas Popratiloff<sup>8</sup>, Karl F. Hoffman<sup>9</sup>, Christoph G. Grevelding<sup>2\*</sup>, Christoph Grunau<sup>3\*</sup>,**  
7 **Paul J. Brindley<sup>1\*</sup>**

8 <sup>1</sup>Department of Microbiology, Immunology & Tropical Medicine, & Research Center for  
9 Neglected Diseases of Poverty, School of Medicine & Health Sciences, George Washington  
10 University, Washington, D.C. 20037, USA.

11 <sup>2</sup>Institute of Parasitology, Biomedical Research Center Seltersberg (BFS), Justus Liebig  
12 University Giessen, Giessen, Germany

13 <sup>3</sup>Interactions Hôtes Pathogènes Environments, University of Perpignan Via Domitia, 66860  
14 Perpignan cedex 9 France

15 <sup>4</sup>Department of Parasitology and Excellence in Medical Innovation, and Technology Research  
16 Group, Faculty of Medicine, Khon Kaen University, Khon Kaen 40002, Thailand

17 <sup>5</sup>Schistosomiasis Resource Center, Biomedical Research Institute, Rockville, MD 20850

18 <sup>6</sup> Faculty of Medical Technology, Rangsit University, Pathum Thani province, Thailand 12000,  
19 Thailand

20 <sup>7</sup>Cellular and Molecular Immunology Research Unit (CMIRU), Faculty of Allied Health  
21 Sciences, Naresuan University, Phitsanulok province 65000, Thailand

22 <sup>8</sup>Nanofabrication and Imaging Center, Science and Engineering Hall, George Washington  
23 University, Washington, D.C. 20052, USA.

24 <sup>9</sup>Institute of Biological, Environmental and Rural Sciences (IBERS), Edward Llwyd Building,  
25 Aberystwyth University, Aberystwyth SY23 3DA, United Kingdom

26 \* Correspondence: , Wannaporn Ittiprasert, email, [wannaporni@gwu.edu](mailto:wannaporni@gwu.edu); Christoph G.  
27 Grevelding, email, [christoph.grevelding@vetmed.uni-giessen.de](mailto:christoph.grevelding@vetmed.uni-giessen.de); Christoph Grunau, email,  
28 [christoph.grunau@univ-perp.fr](mailto:christoph.grunau@univ-perp.fr); Paul J. Brindley, email, [pbrindley@gwu.edu](mailto:pbrindley@gwu.edu)

29 **Abstract**

30 We identified genomic safe harbor sites (GSH) in the human blood fluke, *Schistosoma mansoni*  
31 and developed a CRISPR-focused protocol for insertion of a reporter transgene into a  
32 representative GSH. The protocol employed ribonuclear protein complexes of Cas9 nuclease,  
33 three overlapping guide RNAs, and phosphorothioate-modified, double stranded donor DNAs  
34 encoding green fluorescent protein driven by a strong endogenous promoter. Gene-editing  
35 efficiencies of >20% and reporter transgene fluorescence of >50% of gene-edited eggs were  
36 obtained by five days after CRISPR transfection. These methods and results advance functional  
37 genomics for multicellular parasites, and represent a tractable path towards transgenic  
38 schistosomes using homology directed repair catalyzed transgene insertion. Identification and  
39 characterization of GSH is expected to facilitate consistent transgene activity with neutral  
40 influence on the host cell genome and, concurrently, provide a privileged locus for transgene  
41 activity. This approach should be adaptable to platyhelminths generally.

## 42 Main

43 Clustered Regularly Interspaced Short Palindromic Repeats (CRISPR) technology has  
44 revolutionized genome manipulation in biology, agriculture, and medicine<sup>1-3</sup>. Transgenesis  
45 technologies are integral in diverse applications including gene therapy, biotherapeutics,  
46 agricultural crop and breed enhancements, and deciphering host-pathogen interactions. With  
47 progress emanating from model species and cell lines, tools and techniques can frequently be  
48 adapted and transferred to non-model species. Among these are helminth parasites, which are  
49 responsible for substantial mortality and disease. . According to the WHO, many important  
50 helminth parasites are responsible for ‘neglected tropical diseases’<sup>4</sup>. These mostly occur in the  
51 global south and are responsible for a global burden of disease that exceeds malaria and  
52 tuberculosis. In the post-genomic era of parasitic helminths, like schistosomes, access to  
53 CRISPR-based transgenesis protocols is a public health research priority. Progress for one  
54 helminth species will facilitate technology transfer to major phyla of invertebrates, e.g.,  
55 Platyhelminthes, other Lophotrochozoans and Protostomia, for which CRISPR-based reverse and  
56 forward genetics have yet to be reported and/or are challenging.

57 CRISPR enables targeted site-specific mutation(s), obviating an impediment of earlier  
58 transgenesis approaches that rely on lentiviruses<sup>5</sup> and transposons such as *piggyBac*<sup>6</sup>. These  
59 latter approaches may lead to genetic instability, multi-copy insertion, unstable expression or  
60 even inactivation of the transgene and interference with the endogenous gene. In the process of  
61 genome editing, the DSBs are resolved by several different repair mechanisms, including the  
62 predominant error-prone non-homology end joining (NHEJ) and the templated homologous-  
63 directed repair (HDR). Sister chromatids provide a natural repair template, whereas the latter  
64 also can be donated by exogenous DNA such a plasmid, oligodeoxynucleotides, and PCR  
65 amplicons. When supplied with double-strand (ds) donor DNA with modifications HDR  
66 efficiency can be markedly improved <sup>7</sup>. The system of CRISPR/Cas-assisted HDR has been  
67 applied in *Schistosoma mansoni*<sup>8,9</sup> with promoter free-single strand-deoxynucleotide donor.  
68 Multiple overlapping CRISPR target sites improve precise HDR insertion of large cargoes in  
69 embryonic stem cells<sup>10,11</sup>, while modification of 5’-termini of long dsDNA donors enhance HDR,  
70 favoring efficient, single-copy integration through the retention of a monomeric donor  
71 confirmation and thereby facilitating gene replacement and tagging<sup>12</sup>.

72 We identified safe harbor sites in the genome of *S. mansoni*, and adapted CRISPR/Cas9-based  
73 approaches to insert a reporter transgene into a located site termed GSH1, situated in  
74 euchromatin of chromosome 3. GSH1 was free of repetitive sequences and neighboring long  
75 non-coding regions, a situation likely to minimize off-target effects of CRISPR/Cas activity.  
76 Multiple sites within this region were targeted with programmed RNAs to boost efficiency of  
77 nuclease cleavage and repair in the presence of 5’ 5× phosphorothioate bond modified-donor  
78 template bearing GSH1-specific homology arms. The approach delivered knock-in efficiencies  
79 ~70% in independent replicates of the reporter GFP transgene when the CRISPR materials were  
80 delivered by electroporation to the egg stage of *S. mansoni*, with GFP expression controlled by  
81 the promoter and terminator of an abundantly transcribed *S. mansoni* ubiquitin gene. In brief,  
82 here we provide a new strategy to target-oriented transgene integration into the schistosome  
83 genome.

## 84 Results

### 85 Genome safe harbors predicted in the schistosome genome

86 To identify sites that could serve as potential GSHs, we conducted a genome-wide bioinformatic  
87 search based on established, widely accepted criteria<sup>13</sup>, along with newly introduced criteria  
88 (below), that would satisfy benign and stable gene expression (Table 1). At the outset, we  
89 identified euchromatic regions in all developmental stages of *S. mansoni* to avoid silencing genes  
90 to be integrated upon CRISPR/Cas manipulation. With these criteria, we enriched for regions  
91 that were, firstly, close to peaks of H3K4me3, a histone modification that is associated with  
92 euchromatin and transcription start sites, secondly, regions that did not include H3K27me3, a  
93 histone modification that is associated with heterochromatin<sup>14</sup>, thirdly, regions of open  
94 euchromatin accessible to Tn5 integration, in an Assay of Transposase Accessible Chromatin  
95 sequencing (ATAC-seq) providing a positive display of integration events, and fourth, given that  
96 HIV-1 integrates preferentially into euchromatin in human cell lines<sup>15</sup>, we used sites of HIV  
97 proviral integration known from *S. mansoni*<sup>16</sup> to likewise support predictions of euchromatic  
98 regions.

99 Examination of the draft genome of *S. mansoni* in Worm Base Parasite, version 7 (WormBase  
100 Parasite)<sup>17-20</sup> identified 6,884 regions with enrichment of H3K4me3 in the absence of  
101 H3K27me3 in available developmental stages (H3K4me3 not K3K27me3). In mature, adult  
102 schistosomes, we found consistently 10,533 ATAC positive regions. There were 4,027 ATAC  
103 regions that overlapped with H3K4me3 but not K3K27me3, and 2,915 genes overlapped with  
104 (ATAC and H3K4me3 not H3K27me3). Forty-two unambiguous HIV integration sites were  
105 identified, and eight genes were < 4 kb upstream or downstream from these integration sites.  
106 Annotated expression data were available for six of these genes: endoplasmic reticulum Golgi  
107 intermedia (Smp\_040360), metal tolerance protein C3 (Smp\_150230), aldo keto reductase family  
108 (Smp\_053220), RUN domain containing protein 1 (Smp\_067010), endophilin III (Smp\_036990),  
109 and actin protein ARP2 (Smp\_127830) (Table 1). Genes occurring in these putative GSH regions  
110 are expressed in all developmental stages, although not uniformly (Fig. 1a). The locations of  
111 these potential intragenic GSH sites, which satisfied the above criteria, were Smp\_053220,  
112 Smp\_150230, Smp\_040360, Smp\_127830, Smp\_067010 and Smp\_036990 (Table 1).

113 To identify intergenic GSH, we located 10,149 intergenic regions. There were 9,985 regions  
114 beyond 2 kb upstream and 8,837 regions outside long non-coding-RNA (lncRNA), which were  
115 intersected to 95,587 unique intergenic regions outside 2 kb and lncRNA of  $\geq 100$  bp. Two  
116 hundred regions were identified intersecting with merged ATAC H3K4me3 signal. Four of these  
117 were situated  $\leq 11$  kb distance from HIV integration sites. We termed these four potential gene  
118 free-GSH regions, which satisfied all our criteria, GSH1 (1,416 nt, chromosome 3:13380432-  
119 13381848), GSH2 (970 nt, chromosome 2: 15434976-15435954), GSH3 (752 nt, chromosome 2:  
120 9689988-9690739), and GSH4 (138 nt, chromosome 3: 13381901-13382038), respectively  
121 (Table 1, Fig. 1b), with the names GSH1 to GSH4 based in rank order on their size from longest  
122 to shortest. Several protein-coding gene loci were located proximal to the GSH, although these  
123 were > 2kb distant from these intergenic GSH: Smp\_052890, Smp\_33810, Smp\_071830,  
124 Smp\_245610, Smp\_016380, Smp\_131070, Smp\_052890 and Smp\_150460. These may be non-  
125 essential genes, when based on orthology to essential genes in model eukaryotes<sup>21</sup>.

## 126 **Efficiency of programmed mutation at GSH1 enhanced by multiple guide RNAs**

127 Based on bioinformatic screening for GSH, here we focused here on GSH1, located on  
128 chromosome 3: 13380432-13381848 (1,416 nt) because with 1,416 bp, it was the longest of the  
129 four putative intergenic GSH sites. Guide RNAs (gRNA) possessing high on-target specificity;  
130 three overlapping guide RNAs, sgRNA1, sgRNA2 and sgRNA3 that did not exhibit self-  
131 complementarity, and off-target matches against the reference *S. mansoni* genome (Fig. 2a) were  
132 selected from the list of CRISPR/Cas9 targets predicted by CHOPCHOP<sup>22,23</sup>.  
133 Ribonucleoprotein complexes (RNP) of Cas9 nuclease and each sgRNA were assembled, after  
134 which two mixtures of the three assembled RNPs were prepared. One mixture of CRISPR  
135 materials included two assembled RNPs, sgRNA1 RNP and the sgRNA3 RNP (dual gRNAs) and  
136 the second included three assembled RNPs, sgRNA1 RNP, sgRNA2 RNP and sgRNA3 RNP  
137 (triple, overlapping gRNAs). For each, the mixture of two or three RNP complexes was  
138 delivered to schistosome eggs (or other developmental stages) by electroporation (EP), after  
139 which the transfected eggs were maintained in culture for 15 days. At that point, genomic DNAs  
140 and total RNAs were extracted from the eggs.

141 Efficiency of genome editing was estimated by DECODR<sup>24</sup> analysis of chromatograms of Sanger  
142 sequencing tracings of PCR amplicons spanning the programmed DSBs, amplified from genomic  
143 DNAs using primers flanking DSBs, as indicated in Fig. 2a, among experimental and control  
144 (mock) treatments. The dual RNPs, sgRNA1+ sgRNA3, delivered mutation frequencies at GSH1  
145 of 4.6-6.3% and ~3.7%, respectively, with short deletions (of one to several, nucleotide in length  
146 both on target region 1 and region 3 (Fig. 2b, 2c). Mutations were not detected in the wild type  
147 (control, no treatment) and mock treatment groups (not shown). The three overlapping sgRNAs  
148 (that shared at least six overlapping nucleotides) induced higher mutation efficiencies at GSH1,  
149 with mutation frequencies of 7-15.8%, 9.1-20.2%, and 9.9-19.3% indels at target regions 1, 2 and  
150 3, respectively. In addition, with the triple, overlapping RNPs, larger deletion sizes, up to 115 nt  
151 in length, were recorded among the biological replicates (Fig. 2d-f). CRISPR efficiency for each  
152 sgRNA was analyzed from six independent biological replicates: both sgRNAs provided similar  
153 CRISPR efficiency (Fig. 2g). Notably, however, the combination of the three overlapping  
154 gRNAs delivered higher mutation efficiency compared to the two-overlapping guide RNAs ( $P =$   
155 0.002) (Fig. 2h).

## 156 **Knock-in efficiency increased with overlapping guide RNAs**

157 Multiple sgRNAs with overlapping sequences can enhance CRISPR/Cas9-mediated HDR  
158 efficiency<sup>10</sup>. Here, three overlapping sgRNAs performed better than dual gRNAs from  
159 programmed mutation at GSH1. Subsequently, we investigated transgene knock-in (KI) at GSH1  
160 with three overlapping sgRNAs. As the donor template for programmed homology directed  
161 repair, we used the enhanced green fluorescent protein (EGFP) gene with expression driven by  
162 an optimized *S. mansoni* endogenous ubiquitin promoter and the cognate ubiquitin terminator  
163 region. The donor template also included symmetrical homology arms specific for GSH1,  
164 located on the 5' flank of target site 1 and the 3' flank of target site 3 (Fig. 3a, 3b). The donor  
165 template was delivered to the schistosomes as linearized long double-strand DNA (lsDNA).  
166 Aiming to enhance and favor precise and efficient single-copy integration of the donor transgene  
167 into GSH1 by HDR, we biotinylated the 5' termini of the DNA donor amplicons<sup>12</sup> to shield the  
168 template from multimerization and from integration at the DSB via the non-homologous end-



169 joining (NHEJ) repair pathway (Fig. 3a). First, we investigated the impact of length of the  
170 homology arms (HA), by comparison donor templates (as above) with homology arms of 200 bp,  
171 400 bp and 600 bp in length after DNA restrictions by either dual or triple sgRNAs. We did not  
172 observe EGFP from 200 bp and 400 bp HA *lsDNA* donor in either donor transfected control and  
173 KI parasite eggs at days 5-6 after transfection in both dual and triple sgRNAs treatment  
174 conditions (data now shown). There was inconsistent EGFP expression (<1% or absent) in the  
175 live miracidium with the schistosome egg i with 600 bp HA along with dual sgRNAs (data not  
176 shown). Subsequently, we focused this investigation the donor transgene flanked by homology  
177 arms of 600 bp each in length, with EGFP expression in the eggs examined every second day for  
178 15 days. On examination using spectrally resolved, confocal laser scanning microscopy, EGFP  
179 signals were not observed in the negative control groups, although the “autofluorescence”  
180 characteristic of eggs was apparent<sup>25</sup>. The EGFP signal was also detected in the *lsDNA* donor  
181 control (without RNPs) for several days. The EGFP signal was detected in the CRISPR materials  
182 group that included the *lsDNA* donor with 600 bp HA; the signal was detected up to 15 days (at  
183 which point the experiment terminated).

184 Next, we investigated the 3' and 5' KI at GSH1 by a PCR approach on genomic DNA of  
185 integrated ubiquitin promoter in frame with EGFP and its terminator. For the analysis of 5' PCR  
186 KI, we used a forward primer specific for several nucleotides upstream of the 5' end HA with a  
187 reverse primer specific for the ubiquitin promoter (Fig. 3b). For analysis of the 3' KI integration  
188 junction, the reverse primer was specific for a site downstream of the 3' end of the HA and was  
189 paired with a forward primer specific for the ubiquitin terminator. Fragments representing the 3'  
190 KI and 5' KI integration regions of 983 bp and 728 bp, respectively, were observed in the KI  
191 treatment groups but not in the other (control) groups (Fig. 3c). Expression of the EGFP  
192 transgene was monitored using DNase-treated RNA (to eliminate the possibility of *lsDNA* donor  
193 contamination and genomic DNA): EGFP transcripts were observed in the KI experimental  
194 groups, among which we observed slight variability in transcript abundance among biological  
195 replicates (Fig. 3d).

## 196 **Genome safe harbor accessible in the adult developmental stage of the schistosome**

197 To investigate the impact of CRISPR manipulation on the adult developmental stage of  
198 *Schistosoma*, we electroporated the triple RNPs (sgRNAs1+2+3) and *lsDNA* into 20 worms (10  
199 females, 10 males). *In vitro* maintenance for 10 days yielded similar movement and egg-laying  
200 between the experimental and control cultures. The EGFP expression was observed in some  
201 non-dividing cells of adult worms (Fig. S1), and these EGFP-positive worms survived and were  
202 actively mobile at the time of cessation of the culture (day 11). Efficacy of programmed mutation  
203 was investigated at the genome level using genomic DNAs extracted from EGFP-positive  
204 schistosomes (six females, two males), which involved deep sequencing of amplicons spanning  
205 the predicted DSB by CRISPREsso<sup>26,27</sup>. Alleles with deletions ranging up to 150 nt, likely  
206 resulting from NHEJ, were characterized. The analysis estimated mutation efficiencies of 13.3%  
207 and 16.8% indels for the female and males, respectively (Fig. S1b, S1d). Based on both the *ex*  
208 *vivo* findings with both eggs and adult stages of the schistosome, and the *in silico* predictions for  
209 the presence and criterion conformity of predicted GSH within the genome of *S. mansoni*, we  
210 considered that the intergenic (gene-free region) GSH1 represented a suitable candidate locus for  
211 CRISPR/Cas-catalyzed insertion of a large sized, exogenous, and over expressed reporter  
212 transgene.

## 213 **Transgene expression in the miracidium following programmed insertion**

214 EGFP positivity and intensity in the treated eggs were assessed quantified by using spectral laser  
215 scanning confocal fluorescence microscopy<sup>25</sup>. Active transgene expression was confirmed within  
216 miracidia developing inside transfected eggs (Fig. 4a, b). Firstly, EGFP appeared to be expressed  
217 by cells ubiquitously throughout many tissues and cells of the schistosome larva. Morphological  
218 malformation was not observed in transgenic eggs and their enclosed larvae (eggs,  $n = 402$   
219 aggregated from four independent, biological replicates). More intense GFP fluorescence was  
220 consistently seen and quantified in eggs from the experimental treatment group than the mock  
221 control eggs and in eggs transfected solely with donor template (Fig. 4a1, a2) at the 509 nm.  
222 Subsequently, we used the average EGFP background from negative eggs to normalize intensity  
223 values for specific EGFP fluorescence in the donor *lsDNA* control and the CRISPR with *lsDNA*  
224 treated eggs.

225 In schistosome miracidia within the eggshell at 15 days post electroporation, fluorescence  
226 intensity of transgenic parasites markedly differed from the wild type eggs. Seventy five percent  
227 of 402 eggs examined displayed EGFP fluorescence in miracidia. About 25% of eggs containing  
228 a miracidium transfected with the donor transgene exhibited EGFP (Fig. 1c). However, after  
229 reading fluorescence intensity of EGFP (established by subtracting the signal from  
230 autofluorescence at 509 nm, the emission wavelength for EGFP<sup>25</sup>), the EGFP-specific signal in  
231 the control donor transgene group, 856-1,713 arbitrary units<sup>28</sup> (average, 1,290 au) was  
232 significantly lower than the experimental group transfected with overlapping guide RNPs and the  
233 donor transgene bearing 600 bp HA, 4972.5-8,963.1 au (average, 6,905 au) ( $P < 0.001$ ). EGFP  
234 expression within developing miracidia among the eggs was not apparently localized; diverse  
235 cells and parasite organs expressed the fluorescence reporter gene.

## 236 Discussion

237 Schistosomes are water-borne pathogens and pose a constant threat to human health in the global  
238 south and beyond. Only a single antiparasitic drug, praziquantel, is available for treating  
239 schistosomiasis. In light of the possibility of resistance development, reinfection after treatment,  
240 the absence of immunity to reinfection following curative treatment, and reemergent spread into  
241 southern Europe<sup>29</sup>, likely precipitated by the occurrence of the intermediate hosts, globalization,  
242 and increasing global temperatures, are causes for increasing concern. To advance functional  
243 genomics for schistosomes in the post-genomic era, here (to our knowledge for the first time) we  
244 localized genome safe harbor sites in *S. mansoni*, optimized conditions for delivery and structure  
245 of transgene cargo, inserted the reporter transgene into a predicted intergenic genome safe harbor  
246 (GSH) by programmed CRISPR/Cas9 homology-directed repair by targeted mutation using three  
247 overlapping guide RNAs, and quantified transgene activity using confocal imaging of emission  
248 spectra specific for EGFP green fluorescence protein. More specifically, delivery to the  
249 schistosome egg by electroporation of multiple overlapping guide RNAs delivered with Cas9  
250 nuclease as ribonuclear complexes lead to efficient programmed cleavage of the GSH1. Double-  
251 stranded DNA flanked by chemically modified termini, encoding enhanced EGFP driven by the  
252 endogenous schistosome ubiquitin gene promoter and terminator, served as the model repair  
253 template. Our studies are consequential for two principal reasons. First, the results advance  
254 functional genomics and forward genetics for a hitherto unmet challenge to manipulate a  
255 pathogen of global public health significance. Second, transgenes can be targeted to safe  
256 integration sites to endow individual stages or populations of these pathogens with novel  
257 functions, which will have broad potential for basic and translational studies<sup>30-32</sup>. Third, the  
258 editing methods developed can be adapted for knock-out approaches of genes of interest, in  
259 schistosomes and probably other platyhelminths, for which genome-project data are available.

260 Targeting transgenes using homology-directed repair (HDR) at intergenic GSH sites catalyzed  
261 by RNA-programmed Cas9 can be expected to enable, in effect, a mutation-independent genome  
262 modification to support forward genetics investigation. In the human genome, GSHs, which are  
263 situated either in intergenic or intragenic regions, promote stable expression of integrated  
264 transgenes without negatively affecting the host cell<sup>13</sup>. Access to schistosome intergenic GSH  
265 will also provide a step-change advance for functional genomics of these pathogens. For *S.*  
266 *mansoni*, our prediction criteria for GSH included location in euchromatin to avoid silencing of  
267 the transgene, unique genome-target sequence to minimize off-target events, avoidance of  
268 lncRNA genes, presence of epigenetic marks for open chromatin structure, and the absence of  
269 epigenetic marks indicating heterochromatin. We named the intergenic sites GSH1, -2, -3, and -  
270 4, which were located on chromosomes 2 and 3. (*S. mansoni* has seven pairs of autosomes and Z  
271 and W sex chromosomes.). In addition, we assessed one intergenic GSH1 locus for  
272 CRISPR/Cas9 gene editing and over expression EGFP integration. We predicted potential GSH  
273 in non-essential coding regions of aldo keto reductase, metal tolerance protein C3, endoplasmic  
274 reticulum Golgi intermediate, actin subunit, RUN domain and endophilin III. In similar fashion  
275 to findings that have been reported in human and mouse genomes<sup>33</sup>, we posited that schistosome  
276 GSH will tolerate the integration by CRISPR-catalyzed HDR donor templates and enable stable  
277 expression of the integrated transgenes without negatively impacting the genome of the  
278 transfected helminth and progeny.



279 We edited GSH1 using two and three ribonucleoprotein complexes of Cas9 endonuclease with  
280 the overlapping guide RNAs, sgRNAs numbers 1 and 3 (dual guides approach) and with  
281 sgRNAs numbers 1, 2 and 3 (triple guides approach). Overlapping CRISPR target sites were  
282 selected from lists of target site predicted and ranked by the CHOPCHOP algorithm. The triple  
283 overlapping guides approach delivered higher CRISPR/Cas9 efficiency, and larger sized deletion  
284 mutations than dual guides (Fig. 2), and outcome that would enhance the efficiency of HDR in  
285 the presence of the long stranded DNA (lsDNA) donor template. Accordingly, we deployed the  
286 three overlapping sgRNAs in the CRISPR/Cas9 system to deliver the 3551 bp lsDNA encoding  
287 the reporter transgene - here a *S. mansoni* ubiquitin gene promoter and terminator flanking the  
288 EGFP reporter - to schistosome eggs.

289 This cohort of eggs, termed “liver eggs”, LE, was expected to include > 50% eggs that included  
290 the mature miracidium with the remainder dead eggs or immature/developing eggs<sup>34-36</sup>. By 10  
291 days following transfection, higher expression of EGFP at GSH1 was apparent based on  
292 examination of the normalized fluorescence intensity of the miracidium inside the egg carrying  
293 the transgene. Precise knock-in (KI) was confirmed using target site-specific amplicons (Figs.  
294 3c). Moreover, RT-PCR of the EGFP expression confirmed KI of donor transgene (Fig. 3d).  
295 Using a similar approach, we also investigated programmed gene editing at GSH1 and impact on  
296 fitness in the adult stage schistosome as reflected in motility, morphology, mortality of the  
297 transfected adult schistosomes, and release of eggs *in vitro*. The worms remained active, did not  
298 exhibit apparent morphological changes for at least 11 days after transfection, and the females  
299 released eggs *in vitro*, all of which were similar to the phenotype of the control group  
300 schistosomes. (Fig. S1).

301 These findings indicated that GSH1 represented a promising safe harbor site for forward  
302 genetics-focused forward genomics with this schistosome. With the longer-term goal of deriving  
303 lines of transgenic parasites carrying gain- or loss-of-function mutations, we also undertook  
304 preliminary studies with the newly laid egg of *S. mansoni*, a stage that at its origin includes a  
305 single zygote (surrounded by vitelline yolk cells) and which, therefore, is a window to the  
306 germline<sup>37,38</sup>. As noted, highly efficient HDR resulted from the combination of multiple target  
307 site-overlapping RNPs programmed to cleave GSH1 in the presence of the chemically modified  
308 a repair template protected by chemical modifications. Notably, ~75% of mature eggs ( $n = 402$   
309 eggs from four independent replicates) exhibited reporter transgene fluorescence with the  
310 miracidium developing within the eggshell (Fig. 4c), and significantly more fluorescence than  
311 seen in the control eggs transfected with donor template but not with the RNPs, ~25% ( $n = 397$   
312 eggs, from four independent biological replicates). EGFP signals were not present in the control,  
313 untreated wild type egg, which by 9 days following transfection exhibits minimal background  
314 fluorescence<sup>39</sup>.

315 We also transfected *in vitro* newly laid eggs, termed IVLE, and of the adult stage of the parasite  
316 using the same multiple RNPs targeting GSH1 and donor template. The IVLE, deposited *in vitro*  
317 up to 12 hours after recovery of the adult schistosomes from the euthanized mouse, contains the  
318 zygote and developing blastula including the germ tissue, and were maintained thereafter in  
319 culture for 10 days following transfection with CRISPR materials. These eggs expressed EGFP  
320 by about 7 days after transfection as they developed (Fig. S2). During this 7 days interval, the  
321 eggs grew to contain the fully developed miracidium<sup>40,41</sup>. In contrast to the findings with LE, the  
322 miracidium failed to develop in > 50% transfected IVLE and, of those that did develop, <1%

323 were EGFP-positive. Given the fragility of the IVLE<sup>38,41</sup>, alternative delivery methods to  
324 electroporation, such as lipid nanoparticle containing the RNP and the donor template within a  
325 single lipid enclosed sphere, may improve efficiency<sup>42-46</sup> of delivery to the schistosome nucleus  
326 while minimizing loss of fitness of the manipulated schistosome larva.

327 Nonetheless, this study demonstrated that the GSH1 locus is a prospective safe harbor locus site  
328 for germline transgene integration in *S. mansoni* although further validation is needed.  
329 Comparison of the utility of GSH1 with the other gene-free GSH, GSH2, -3, and -4 (Fig. 1),  
330 might also uncover profitable modifications. Likewise, the intragenic sites may exhibit expedient  
331 attributes functional genomics. The safe harbors in human gene therapy, *CCR5*, *AAVS1*, and  
332 *Rosa26*, all reside within intragenic, gene-rich loci and whereas they have been targeted with  
333 therapeutic gene cargo, including for example the insertion of *FANCA* at *AAVS1* in  
334 CD34<sup>+</sup> hematopoietic progenitors from Fanconi anemia patients<sup>47</sup>, ideally intergenic sites might  
335 be inherently safer<sup>33</sup>. Overall, this report and the methods presented here enabled novel insight  
336 into efficient transgenesis and forward genetics for *S. mansoni* and will promote forward genetics  
337 approaches in functional genomics for schistosome and related helminth parasites.

338 **Online content**

339 **Methods**

340 **Computational search for gene safe harbors in *Schistosoma mansoni***

341 We undertook a genome analysis of intergenic (gene-free) and intragenic (gene-linked) regions  
342 to identify prospective a genome safe harbor, in like fashion approaches focused on the human  
343 genome<sup>13</sup>. In essence, we aimed to locate a GSH to enable stable expression of the integrated  
344 transgene free of interference from the host genome, and which in parallel integrates and  
345 transcribes transgenes without negative consequences for the host genome or cell<sup>33</sup>. *Gene-linked*  
346 *GSH*, deployed four criteria. First, adjacent to peaks of H3K4me3, a histone modification  
347 associated with euchromatin and transcription start sites; second, not near or containing  
348 H3K27me3, which is associated with heterochromatin, in any of the life-cycle stages; third,  
349 open, euchromatic chromatin was accessible to Tn5 integration and ATAC-sequence provides a  
350 positive display of such integration events. Consequently, safe harbor candidate regions should  
351 deliver an ATAC-sequence signal; and fourth, near known HIV integration sites. Given that HIV  
352 integrates preferentially into euchromatin in human cells, HIV integration into the schistosome  
353 genome may likewise indicate a euchromatic region.

354 To find loci conforming to the four criteria, pooled ChIP-seq data for H3K4me3 and K3K27me2  
355 from previous studies<sup>48</sup> was aligned against on *S. mansoni* genome data (version 7 on the date of  
356 analysis). ATAC-seq was performed as previously described with slightly modification<sup>49</sup>.  
357 Peakcalls of ChIP-seq and ATAC-Seq were done with Chromstar<sup>48,50</sup> and stored as Bed files.  
358 Bed files were used to identify the presence of H3K4me3 and absence of H3K27me3 in adults,  
359 miracidia, *in vitro* sporocysts, cercariae and *in vitro* schistosomule with hbedtools intersect.  
360 Thereafter, ATAC-seq data from males and females (two replicates each) were intersected to  
361 find common ATAC positive regions. H3K4me3-only (H3K27me3 absent) common to all stages  
362 and ATAC signals were intersected to find common regions. H3K4me3 common to all parasite  
363 stages and ATAC signals were intersected to find common regions. Next, the HIV integration  
364 sites were identified by using data from ERR338338<sup>51</sup>. Reads were mapped to the lentivirus  
365 genome (HIV-1 vector pNL-3, accession AF324493.2) using Bowtie2 with default parameters.  
366 Those paired reads were extracted where one end mapped to HIV and the other end mapped to  
367 schistosome genome at a unique location. Genes from the BED files above that located  $\leq 11$  kb  
368 HIV-1 integration sites were identified with bedtools closestbed. Gene expression data of these  
369 genes were obtained from <https://meta.schisto.xyz/analysis/>. Information remains unavailable for  
370 Smp\_343520.

371 *Intergenic GSH*. Given that transgene integration into and existing gene could disrupt key  
372 functions and endow selective (dis)advantage to the genetically modified cell and its  
373 progeny<sup>52,53</sup>, we scanned constitutively euchromatic regions for a gene-free region. We defined  
374 genes as protein coding sequences and sequences coding for long non-coding RNA (lncRNA).  
375 In view of our goal to use CRISPR/Cas mediated-HDR to insert the transgene, ideally, we  
376 searched preferentially for unique sequences, to obviate off-target gene modification, and  
377 excluded gene free-regions composed of repetitive sequences. Those unique sequences were also  
378 annotated outside lncRNA, regions beyond putative promoters that we deemed as 2 kb upstream  
379 of the transcription termination site (TTS), and the regions close to peaks of H3K4me2 in all

380 parasite stages which never contained H3K27me3. The regions also overlapped ATAC-seq  
381 positive sites with  $\leq 11$  kb distance from HIV integration sites were included (~10 kb is the size  
382 of the HIV genome).

383 Integrating a transgene into an existing gene or its putative promotor region could disrupt  
384 important function and provide a selective disadvantage to the genetically modified cells.  
385 Therefore, we deliberately searched for gene-free constitutive euchromatic regions. Here we  
386 define gene as protein coding genes and genes coding for long non-coding RNA (lncRNA).  
387 Integration *via* Crispr/Cas relies on guide RNA with specific, ideally unique sequences. To  
388 exclude gene-free regions that are composed of repetitive sequences, we also searched for  
389 repeats. A total of 10,129 protein coding gene locations and 27 pseudogenes were extracted  
390 from the schistosome genome annotation. BEDtools were used to delimit 2 kb upstream regions  
391 (FlankBed). Annotations of 16,583 lncRNA were pooled from  
392 <http://verjolab.usp.br/public/schMan/schMan3/macieleEtAl2019/files/macieleEtAl2019.bed12<sup>54</sup>>.  
393 Repeats were masked with RepeatMasker V4.1.0 using a specific repeat library produced with  
394 RepeatModeler2 V2.0.1 and stored as a GFF file. BED files with coordinates outside these  
395 annotations were generated by BedTools complementBed. Finally, BedTools Multiple Intersect  
396 was used to identify regions that are common to unique regions (complement of repeatmasker),  
397 intergenic regions, > 2 kb upstream and outside of lncRNA. Only regions  $\geq 100$  bp were  
398 retained. We reasoned that otherwise it would be too difficult to design guide RNAs. These  
399 regions were intersected with merged H3K4me3-only common to all developmental stages and  
400 ATAC signals (euchromatic signal). BedTools ClosestBed was used to determine distance to the  
401 nearest HIV provirus integration.

402 *Gene-linked GSH*. Here we also used the above criteria. Overlapping genes were identified using  
403 published *S. mansoni* version 7 annotation. Then, the HIV integration sites were identified by  
404 ERR338338<sup>51</sup>. Reads were mapped to the virus genome (HIV-1 vector pNL-3, accession  
405 number AF324493.2) using Bowtie2 with default parameters. Those paired reads were extracted  
406 where one end mapped to HIV and the other end mapped to schistosome genome on a unique  
407 location. Genes from the BED files above that located  $\leq 4$  kb HIV integration sites were  
408 identified with bedtools closestbed. Gene expression data of these genes were obtained from  
409 <https://meta.schisto.xyz/analysis/>.

410 Table 1 summarizes the criteria used to predict schistosome genome safe harbor sites.

#### 411 **Developmental stages of the schistosome**

412 Mice (female, Swiss Webster) infected with *S. mansoni* were obtained from the Schistosomiasis  
413 Resource Center (Biomedical Research Institute, Rockville, MD) within seven days of infection  
414 by cercariae (180 cercariae/mouse/ percutaneous route of infection). The mice were housed at the  
415 Animal Research Facility of George Washington University, which is accredited by the  
416 American Association for Accreditation of Laboratory Animal Care (AAALAC no. 000347) and  
417 has the Animal Welfare Assurance on file with the National Institutes of Health, Office of  
418 Laboratory Animal Welfare, OLAW assurance number A3205. All procedures employed were  
419 consistent with the Guide for the Care and Use of Laboratory Animals. The Institutional Animal  
420 Care and Use Committee (IACUC) of the George Washington University approved the protocol  
421 used for maintenance of mice and recovery of schistosomes.

422 Mice were euthanized at about 46 days after infection, after which schistosomes were recovered  
423 by portal vein perfusion with 150mM NaCl, 15mM sodium citrate, pH 7.0. The worms were  
424 washed with 1×PBS, 2% antibiotic/antimycotic and maintained thereafter in DMEM, 10% heat  
425 inactivated bovine serum, and 2% antibiotic/antimycotic at 5% CO<sub>2</sub>, 37°C<sup>55</sup> In addition, at  
426 necropsy, the liver were resected, rinsed in 70% ethanol, washed twice with 1×PBS, before  
427 blending with a tissue homogenizer. Liver tissue homogenate was incubated with collagenase at  
428 37°C for 18 h after which schistosome eggs were recovered by Percoll gradient centrifugation, as  
429 described<sup>56</sup>. Eggs isolated from livers, termed LE<sup>41</sup>, were cultured overnight before transfection.  
430 From cultures of the perfused adult worm population, concurrently, eggs laid in culture by adult  
431 female schistosomes from 0 to 12 hours after necropsy, were collected and maintained in high  
432 nutrient medium (modified Basch's medium)<sup>55</sup>. We termed these eggs, *in vitro* laid eggs  
433 (IVLE)<sup>41</sup>. At its release from the female, the IVLE contains the zygote surrounded by yolk cells.  
434 The larva grows and by day 7 has developed into the mature miracidium<sup>40</sup>.

### 435 **Guide RNAs, ribonucleoprotein complexes**

436 For transfection, we focused on GSH1, located on *S. mansoni* chromosome 3; 13380432-  
437 13381848 (Table 1), an intergenic safe harbor site with the longest region (1,416 nt) among the  
438 predicted intergenic GSHs. Single gRNAs (sgRNA) for GSH1 were designed with assistance of  
439 the CHOPCHOP<sup>22,23,57</sup> tools, using the version 7 annotation of the *S. mansoni* genome<sup>17</sup>, to  
440 predict target sites, off-targets, and efficiency of CRISPR/Cas9 programmed cleavage. Three  
441 overlapping (expected DSB sites, 6-12 nt apart) CRISPR target sites; sgRNA1, sgRNA2, and  
442 sgRNA3 with predicted absence of both off-target effects and self-complementarity, and each  
443 with similar CRISPR efficiency ~50% were selected. Although these sgRNAs were not among  
444 the top five predicted by CHOPCHOP, they did exhibit off-target identity to the genome. Their  
445 CRISPR efficiency was 55.7% (rank 7), 47.0% (rank 16), and 36.0% (rank 23), and they were  
446 located on the forward strand of GSH1 at nucleotide positions 605-624, 617-636, and 623-642,  
447 respectively (Fig. 2a). Synthetic guide RNAs, Alt-R CRISPR-Cas9 sgRNA chemically modified  
448 to enhance functional stability, and recombinant *Streptococcus pyogenes* Cas9 nuclease, Alt-R  
449 HiFi Cas9 which includes nuclear localization sequences (NLS), were purchased from Integrated  
450 DNA Technologies, Inc. (IDT) (Coralville, IA). Each ribonucleoprotein complex (RNP) was  
451 prepared in the separate tube, with Cas9 and a single sgRNA at 1:1 ratio, in 25 µl Opti-MEM.  
452 The sgRNA was mixed with the nuclease by gentle pipetting and incubated for 10 min at room  
453 temperature to allow assembly of the RNP.

### 454 **Donor plasmid construct and preparation of long double strand DNA donor**

455 The donor plasmid vector (pUC-Ubi-EGFP-ubi) was synthesized and ligated into pUC by Azenta  
456 Life Sciences (Chelmsford, MA). The construct included homology arms of 600 bp length  
457 corresponding to GSH1 at 22-621 nt (5'-homology arm) and 640-1239 nt (3'-homology arm),  
458 respectively, flanking the in frame expression cassette composed of the *S. mansoni* ubiquitin  
459 promoter (2,056 bp), EGFP (717 bp), and the ubiquitin terminator (578 bp). Plasmid DNA was  
460 amplified by PCR using Phusion High-Fidelity DNA Polymerase (New England Bio-Labs,  
461 Ipswich, MA, cat no. M0530) with primers specific for the 5' and 3' termini of the homology  
462 arms. These primers were 5'end biotinylated and 5×phosphorothioate-modified to enhance  
463 stability; 5'-modified long dsDNA donor (lsDNA) enhances HDR and favors efficient single-  
464 copy integration by its retention of monomeric conformation<sup>12</sup> (Fig. 3a).



465 PCRs were carried out in 50  $\mu$ l reaction volume containing 200  $\mu$ M dNTPs, 0.5 $\mu$ M of each  
466 primer, 100 ng pUC-Ubi-EGFP-ubi, 3% DMSO and 1 unit of Phusion DNA polymerase, with  
467 thermocycling at 98°C, 30 sec, 30 cycles of 98°C, 10 sec, 55°C, 30 sec, 72°C, 3 min, and final  
468 extension at 72°C, 10 min. Amplification products were isolated using the NucleoSpin Gel and  
469 PCR Cleanup and gel extraction kit (Takara, San Jose, CA, cat no. 740609), eluted in 30  $\mu$ l  
470 nuclease-free water, and the long stranded (ls) DNA donor stored at -20°C until used.

#### 471 **Transfection of schistosomes**

472 Ten thousand eggs (LE) of *S. mansoni*, 20 adult stage schistosomes, or ~300 *in vitro* laid eggs  
473 (IVLE) were washed three times with ice-cold 1 $\times$ PBS before transfer into 4 mm pathway  
474 cuvettes (BTX, Holliston, MA) with ~100  $\mu$ l Opti-MEM as electroporated buffer. Each 25  $\mu$ l of  
475 RNP and lsDNA donor was immediately added into the cuvette, to a total cuvette volume of  
476 ~300  $\mu$ l. Transfection of schistosome eggs and adults with CRISPR materials was accomplished  
477 using square wave electroporation (Electro SquarePorator ECM 830, BTX), with a single pulse  
478 of 125 volts for 20 ms, transfection conditions as optimized previously<sup>8,9,58</sup>. Thereafter, the  
479 transfected schistosome stages were transferred to culture medium (as above).

#### 480 **Nucleic acids**

481 To recover genomic DNA and total RNA, eggs from each replicate were triturated in ~100  $\mu$ l  
482 DNA/RNA Shield solution (Zymo Research, cat no. R1100, Irvine, CA) using a motor-driven  
483 homogenizer fitted with a disposable pestle and collection tube (BioMasher II, Bunkyo-ku,  
484 Tokyo, Japan). DNA was isolated from 50% of the homogenate, and RNA from the remainder.  
485 250  $\mu$ l DNazol<sup>®</sup> ES (Molecular Research Center, Inc., Cincinnati, OH; cat no. DS128) was  
486 dispensed into the homogenate, and DNA recovered according to the manufacturer's protocol.  
487 Total RNA was extracted from the homogenate by adding 250  $\mu$ l RNazol RT (Molecular  
488 Research Center, Inc., cat no. RN190). Yields and purity were assessed quantified by  
489 spectrophotometry (NanoDrop One Spectrophotometer, ThermoFisher Scientific), using ratios of  
490 absorbance at 260/280 and 260/230 nm<sup>59</sup>.

#### 491 **Analysis of CRISPR on-target efficiency**

492 Amplicons of GSH1 spanning the programmed DSBs were obtained using population genomic  
493 DNA (above) and primers termed 'control-F and control-R primers' that cover the region  
494 flanking expected double strand break of all the CRISPR target sites. Amplification products  
495 were purified (NucleoSpin Gel and PCR Cleanup and gel extraction kit, cat no. 740609, Takara)  
496 and the nucleotide sequences determined by Sanger cycle sequencing (Azenta Life Sciences,  
497 South Plainfield, NJ). Chromatograms of the sequence traces of experimental and control  
498 group(s) was compared using DECODR<sup>24</sup> at default parameters. NGS deep sequencing was  
499 undertaken on y genomic DNAs of eggs, IVLE and adult schistosomes, using the Amplicon EZ  
500 sequencing with 2 x 300 bp configuration (Azenta Life Sciences). Subsequently, >100,000  
501 sequence reads per sample were analyzed by CRISPResso<sup>29,26,27</sup> with window analysis 200 bp  
502 parameter, multiple sgRNA targets. Deeply sequenced reads (>100,00 reads) were analyzed  
503 using CRISPResso2, with resulting merged images used to plot the indel size distributions of the  
504 experimental compared to the wild type reference.

## 505 **Detection of transgene integration into the schistosome genome**

506 Integration of donor transgene at GSH1 was analyzed by PCR with GoTaq G2 DNA polymerase  
507 (cat no. M7841, Promega, Madison, WI) using two pairs of primers; one locates on the GSH1  
508 using specific primers upstream or downstream of the homology arms paired with primers  
509 specific for the transgene (Fig. 2b), as described previously<sup>9</sup>. PCR conditions: 95°C, 2 min, 40  
510 cycles 94°C, 15 sec, 58°C 30 sec, 72°C, 60 sec. Amplification products were size separated by  
511 electrophoresis and stained with ethidium bromide. The expected product sizes for the 5' and 3'  
512 integration site specific amplicons were 728 bp and 983 bp, respectively, and an amplification  
513 control was included, expected product size 764 bp (Fig. 2b).

## 514 **Quantification of EGFP transgene expression by RT-PCR**

515 To examine the mRNA expression of EGFP, total RNAs were extracted from the LE by  
516 RNazol<sup>®</sup> RT (Molecular Research Center, Inc., cat no. RN190) as manufacturer's manual. The  
517 total RNA was transcribed into cDNA after treated with DNase enzyme to get rid of genomic  
518 DNA contamination or unuse lsdNA donor using Maxima First Strand cDNA synthesis kit with  
519 DNase (Thermo Fisher Scientific). The qPCR was performed using the GoTaq<sup>®</sup> G2 DNA  
520 polymerase (cat no. M7841, Promega, Madison, WI) with the specific primers; EGFP-F 5'-  
521 atggtgagcaagggcgagg-3' and EGFP-R 5'-ctgtacagctcgtccatgcc-3' (Fig. 3b) with expected  
522 amplicon at 717 bp. *S. mansoni* GAPDH (Smp\_056970) was used as the reference gene. The  
523 specific primer for GAPDH-specific oligos: GAPDH-F; 5'-atgggacattccaggcgag-3', GAPDH-R;  
524 5'-ccaacaacgaacatgggtgc-3', expected amplicon of 213 bp in length. PCR cycling conditions:  
525 95°C, 2 min, 25 cycles 94°C, 15 sec, 58°C, 30 sec, 72°C, 30 sec, after which amplification  
526 products were separated by electrophoresis through 1% agarose and stained with ethidium  
527 bromide.

## 528 **Quantification of EGFP fluorescent by spectral fluorescent unmixing in schistosome** 529 **parasite**

530 Spectral and spatial distribution of EGFP fluorescence were assessed using confocal laser  
531 scanning microscopy, using a Zeiss LSM710 Meta detector fitted Axiovert 200 (Carl Zeiss, Jena,  
532 Germany). Images were collected with the C-Apochromat 20×, 1.2 NA water immersion  
533 objective. Spectroscopic measurements were performed in response to excitation by 458 nm  
534 (16.5 μW) Arion laser line and 633 nm He/Ne laser line (Lasos Lasertechnik, Jena, Germany),  
535 which were used for focus and transmission mode imaging. Emission was detected with spectral  
536 META detector at 16 channels 477-638 nm simultaneously. A hurdle when viewing of EGFP via  
537 fluorescence microscope autofluorescence known to originate from the egg shell and adult  
538 female *S. mansoni*<sup>60,61,62</sup>, with vitelline cells determined to be the source of the emission  
539 signals<sup>63</sup>. Accordingly, all spectra of EGFP expressed in a miracidium inside each eggshell or  
540 cell in the adult stage worm were obtained by selecting the interest area (a whole miracidium  
541 inside egg or spots of cells inside the worm) in multispectral images using LSM Image Examiner  
542 and were collected for solvent background by subtracting autofluorescence regions from the  
543 entire auto fluorescent egg. Total EGFP intensity was calculated by the software at 509 nm<sup>63</sup>  
544 from a total of ~400 eggs containing a miracidium in each of both the control and experimental  
545 groups, all of which contained the miracidium (~100 eggs from each of four biological  
546 replicates). Images from adult worms were collected at day 15 following transfection.

547 **Acknowledgements**

548 Schistosome-infected mice were provided by the NIAID Schistosomiasis Resource Center of  
549 Biomedical Research Institute, Rockville, MD through NIH-NIAID contract  
550 HHSN272201700014I for distribution through BEI Resources. This work was supported by  
551 Wellcome Trust award 107475/Z/15/Z (PI, Karl F Hoffmann).

552 **Author contributions**

553 P.B., C.G, and C.G.G. conceived the study. W.I. planned and performed the gene editing,  
554 transgene knock in and data analysis. M.M. and T.Q. contributed promoter and terminator  
555 cloning and analysis for EGFP expression. R.R. performed optimization of the donor to use.  
556 V.H., A.M, L.M, S.S, and M.M. maintained the parasite life cycle, parasite collection and  
557 purifications. P.W. and W.B. investigated indel and transgene knock in, M.M and A.P.  
558 contributed to analysis of confocal micrographs, C.C., C.G. and K.H. contributed the gene safe  
559 harbor analysis. All authors contributed to the writing, and all approved the final version of the  
560 manuscript.

561 **Competitive interests**

562 The authors declare no competing interests.

## 563 Figure legends

### 564 **Figure 1. Normalized gene expression of predicted intragenic GSH sites and the locations** 565 **of gene-free stretches bearing GSHs on chromosomes 2 and 3 of *Schistosoma mansoni*.**

566 Panel **a**. Normalized expression (X-axis) for the intragenic GSH at each developmental stage of  
567 the schistosome. The protein coding sequences for Smp\_036990, Smp\_053220, Smp\_150230,  
568 Smp\_040360, Smp\_127830, and Smp\_067010 are shown in green, blue, yellow, gray, orange,  
569 and dark blue colored bars, respectively. **b**. Four extragenic GSH sites (blue rectangles),  
570 specifically GSH2 and GSH3 on chromosome 2 and GSH1 and GSH4 on chromosome 3. The  
571 red boxes and bars indicate the endogenous genes proximal to the predicted GSHs. The  
572 accession number, Smp\_xxxxxx, of each gene is indicated. Black and white bars indicate GSH  
573 position coordinates on the chromosome.

### 574 **Figure 2. Programmed mutation of genome safe harbor enhanced by three overlapping** 575 **guide RNAs.** Panel **a**. Schematic diagram to indicate sites of the overlapping guide RNAs within 576 GSH1. **b-c, g**. Representative examples of indel percentages at GSH1, as a measurement of 577 CRISPR catalyzed gene editing efficiency, as estimated using analysis of nucleotide sequences 578 by the Deconvolution of Complex DNA Repair (DECODR) algorithm using distance from two 579 overlapping guide RNAs, gRNA 1 and gRNA 3. Small deletions, 1-3 nt in length, of 1.7-13.8% 580 indel mutations were estimated from each target site (panel g, left box). **d-f, g**. Larger mutations 581 of $\leq 115$ nt with higher CRISPR/Cas9 efficiency (2.5-71.9%) were observed at each target site 582 following KI using guide RNAs numbers 1, 2 and 3 (panel g, right side). **h**. The approach 583 deploying the three-overlapping guide RNAs was significantly more efficient than that using two 584 overlapping guide RNAs, as assessed from six, independent biological replicates ( $P = 0.0021$ , 585 unpaired $t$ -test) with the 95% confidence interval (CI) for the difference between the means, 6.17 586 to 20.74; $20.18 \pm 13.45\%$ ( $X \pm SEM$ ) observed using three overlapping guide RNAs and $6.73 \pm$ 587 $3.27\%$ ( $X \pm SEM$ ) with two gRNAs.

### 588 **Figure 3. Targeted insertion and transgene expression at GSH1 in the egg stage of** 589 ***Schistosoma mansoni*.** Programmed CRISPR/Cas9 insertion (knock-in, KI) at GSH1 on 590 chromosome 3 of *S. mansoni* of a donor repair template of 4.451 kb in length, encoding an EGFP 591 transgene driven by the endogenous *S. mansoni* ubiquitin promoter and terminator. Panel **a**. 592 Topology of double-stranded DNA donor prepared from a primer pair with 5' 5x- 593 phosphorothioate modification. The donor template encoded the *S. mansoni* ubiquitin promoter 594 (pink bar) driving expression of the EGFP reporter gene (green) and ubiquitin terminator (pink) 595 and was flanked at its termini with symmetrical 600 bp homology arms (black bars). The 596 homology arm on the left (HAL) was situated 600 nt of upstream of the position of sgRNA1 and 597 the homology arm on the right (HAR) is 600 nt of downstream of that of sgRNA 3. **b**. Schematic 598 illustration of the WT and knock-in alleles after multiple double stranded breaks programmed by 599 sgRNAs 1, 2 and 3 (scissors). The PCR primers used are shown as purple arrows. **c**. Targeted 600 knock-in of the EGFP cassette detected by genomic PCR using 5'KI (728 bp) or 3'KI (983 bp) 601 primer pairs. Negative controls for KI included wild type (WT), mock, and donor treatment 602 groups not exposed to RNPs/Cas9 nuclease. **d**. EGFP transcript expression (717 bp) by RT- 603 qPCR following the integration into the egg of the parasite into the GSH1 as well as schistosome 604 GAPDH (213 bp). The three biological replicates of knock-in and its terminator are shown in 605 lanes KI-1, KI-2 and KI-3 represent three independent biological replicates of programmed 606 insertion of the ubiquitin promoter-driven EGFP, and lanes 1-3 show the RT-qPCR outcomes

607 from schistosome RNA with donor DNA electroporation (without CRISPR materials - nuclease  
608 or guide RNAs). Double-stranded DNA donor was used as the positive PCR template.  
609 Transcription of GAPDH was seen in all treatment and control groups (lanes 1-3 and KI-1 to KI-  
610 3 in bottom panel) but not in the donor group. Primer-dimer and/or non-specific PCR band(s)  
611 from DNA donor transfected-eggs were  $\leq 100$  bp in size.

612 **Figure 4. Markedly higher numbers of eggs emitting green fluorescence following**  
613 **programmed knock-in of the reporter transgene at genome safe harbor as assessed by**  
614 **spectral image analysis.** Confocal laser scanning micrographs: Panel **a**, eggs exhibiting  
615 background signal (autofluorescence) from the control group, *i.e.* eggs transfected with donor  
616 repair template only; a1 and a2, representative images from biological replicates. Panel **b**, eggs  
617 expressing the EGFP encoding transgene from the experimental group transfected with RNPs  
618 and the donor repair template; b1, b2, representative images from two biological replicates.  
619 Many eggs expressed EGFP with the broad range in intensity of fluorescence ranging from  
620 higher intensity (green arrow) and lower levels (yellow arrow) following programmed homology  
621 directed repair; micrographs taken at day 5 after transfection. Eggs expressed EGFP until day 15  
622 (experiment terminated). Panel **c**, micrograph showing representative images to demonstrate the  
623 EGFP and autofluorescence of individual eggs. Panel **d**, mean emission spectral intensity for  
624 eggs, scanned from 477-638 nm, with curves for each of the four biological replicates presented.  
625 Spectral signal, and the signal at 509 nm (peak wavelength for EGFP) for each positive egg was  
626 normalized with the average autofluorescence signal from the same biological experiment. and  
627 with the points showing mean values. Panel **e**, Percentage of egg population positive for EGFP  
628 fluorescence. Control group (gray), experimental group (green); findings from four independent,  
629 biological replicates (~100 eggs per group); eggs expressing EGFP in the control group, 23.7%  
630 (range, 19 to 32%), eggs expressing EGFP in the experimental group, 74% (range, 68-79%);  $P <$   
631  $0.001$ , two-tailed  $t = 69.87$ ,  $df = 142$ ; difference between means (EGFP-KI – only donor)  $\pm$   
632 SEM,  $49.7 \pm 0.7$ , 95% CI, 48.3 to 51.1. Panel **f**, normalized fluorescence spectral intensity from  
633 control eggs (transfected with donor repair template) exhibiting higher intensity than  
634 autofluorescence; these eggs were also scored as EGFP-positive, and with a normalized EGFP  
635 intensity mean, 1290 au (range, 856 - 1712.8); experimental group, normalized-EGFP intensity,  
636 mean 6905 au (range 4971.5 – 8963.1);  $P < 0.001$ , unpaired  $t$ -test,  $n = 402$ ; difference between  
637 means of experimental and control group eggs  $\pm$  SEM,  $5651 \pm 57.40$ , 95% CI, 5502 to 5728).



638 **Supporting information**

639 **Figure S1. GSH1 deletions resulting from CRISPR/Cas9-derived NHEJ and random**  
640 **expression of GFP transgene resulting from HDR in 100% survival *S. mansoni* mature**  
641 **worms.** Ten males or 10 female *S. mansoni* were transfected with multiple RNPs and lsdDNA  
642 donor encoding EGFP driven by the ubiquitin promoter to investigate fitness of the schistosomes  
643 following CRISPR-associated manipulation. EGFP expression was evident in six females and  
644 two males (green arrow) (panels a, c). Blue arrows indicate autofluorescence that was also  
645 apparent in these worms (Zeiss LSM710 confocal microscope, 20× magnification). At this  
646 magnification, it was not possible to capture micrographs of the entire worm (panel e). Genomic  
647 DNA from EGFP-positive worms was pooled and analyzed for programmed mutations (indels)  
648 (y-axis panels b, d). Large-sized gene deletions were apparent, up to 150 nt in female and 120 nt  
649 in the males CRISPResso2 is limited in its analysis of efficiency of HDR in this study given the  
650 donor transgene is 4.4 kb in length. All female and male worms survived until day 11 when the  
651 experiment was terminated

652 **Figure S2. EGFP expression in *in vitro* laid eggs.** *In vitro*-laid eggs (IVLE) released overnight  
653 from adult schistosomes (~200 worms) were transfected by electroporation with RNPs (three  
654 overlapping guide RNAs) and donor repair template. At transfection (day 0), the IVLEs  
655 contained a few parasite cells and germ cells. Transfected IVLEs were maintained in high  
656 nutrition medium for 10 days. At this point, some of the eggs (<10%) contained the fully  
657 developed miracidium (panel a). EGFP expression in the miracidium (green arrow) was apparent  
658 in a few of these eggs of the population (<1%) in culture (Zeiss LSM 710, 20X magnification).  
659 In similar fashion to the outcome with the adult schistosomes (Fig. S1), programmed deletions  
660 were seen in the genome of these eggs, following CRISPResso2 analysis of the sequence reads  
661 (b).

## 662 References

- 663 1 Zhu, H., Li, C. & Gao, C. Applications of CRISPR-Cas in agriculture and plant  
664 biotechnology. *Nat Rev Mol Cell Biol* **21**, 661-677 (2020).  
665 <https://doi.org/10.1038/s41580-020-00288-9>
- 666 2 Zaib, S., Saleem, M. A. & Khan, I. CRISPR-Cas9 Genome Engineering: Trends in  
667 Medicine and Health. *Mini Rev Med Chem* **22**, 410-421 (2022).  
668 <https://doi.org/10.2174/1389557521666210913112030>
- 669 3 Wang, F. & Qi, L. S. Applications of CRISPR Genome Engineering in Cell Biology.  
670 *Trends Cell Biol* **26**, 875-888 (2016). <https://doi.org/10.1016/j.tcb.2016.08.004>
- 671 4 Hotez, P. J. *et al.* Helminth infections: the great neglected tropical diseases. *J Clin Invest*  
672 **118**, 1311-1321 (2008). <https://doi.org/10.1172/JCI34261>
- 673 5 Naldini, L. *et al.* In vivo gene delivery and stable transduction of nondividing cells by a  
674 lentiviral vector. *Science* **272**, 263-267 (1996).  
675 <https://doi.org/10.1126/science.272.5259.263>
- 676 6 Li, X. *et al.* piggyBac transposase tools for genome engineering. *Proc Natl Acad Sci U S A*  
677 **110**, E2279-2287 (2013). <https://doi.org/10.1073/pnas.1305987110>
- 678 7 Guo, J. C. *et al.* Highly Efficient CRISPR/Cas9-Mediated Homologous Recombination  
679 Promotes the Rapid Generation of Bacterial Artificial Chromosomes of Pseudorabies  
680 Virus. *Front Microbiol* **7**, 2110 (2016). <https://doi.org/10.3389/fmicb.2016.02110>
- 681 8 Ittiprasert, W. *et al.* Programmed genome editing of the omega-1 ribonuclease of the  
682 blood fluke, *Schistosoma mansoni*. *Elife* **8**:e41337 (2019).  
683 <https://doi.org/10.7554/eLife.41337>
- 684 9 Ittiprasert, W. *et al.* RNA-Guided AsCas12a- and SpCas9-Catalyzed Knockout and  
685 Homology Directed Repair of the Omega-1 Locus of the Human Blood Fluke,  
686 *Schistosoma mansoni*. *Int J Mol Sci* **23** (2022). <https://doi.org/10.3390/ijms23020631>
- 687 10 Jang, D. E. *et al.* Multiple sgRNAs with overlapping sequences enhance CRISPR/Cas9-  
688 mediated knock-in efficiency. *Exp Mol Med* **50**, 1-9 (2018).  
689 <https://doi.org/10.1038/s12276-018-0037-x>
- 690 11 Acosta, S., Fiore, L., Carota, I. A. & Oliver, G. Use of two gRNAs for CRISPR/Cas9  
691 improves bi-allelic homologous recombination efficiency in mouse embryonic stem cells.  
692 *Genesis* **56**, e23212 (2018). <https://doi.org/10.1002/dvg.23212>
- 693 12 Gutierrez-Triana, J. A. *et al.* Efficient single-copy HDR by 5' modified long dsDNA  
694 donors. *Elife* **7** (2018). <https://doi.org/10.7554/eLife.39468>
- 695 13 Sadelain, M., Papapetrou, E. P. & Bushman, F. D. Safe harbours for the integration of  
696 new DNA in the human genome. *Nat Rev Cancer* **12**, 51-58 (2011).  
697 <https://doi.org/10.1038/nrc3179>
- 698 14 Zhang, T., Cooper, S. & Brockdorff, N. The interplay of histone modifications - writers  
699 that read. *EMBO Rep* **16**, 1467-1481 (2015). <https://doi.org/10.15252/embr.201540945>
- 700 15 Schroder, A. R. *et al.* HIV-1 integration in the human genome favors active genes and  
701 local hotspots. *Cell* **110**, 521-529 (2002). [https://doi.org/10.1016/s0092-8674\(02\)00864-4](https://doi.org/10.1016/s0092-8674(02)00864-4)
- 702 16 Suttiprapa, S. *et al.* HIV-1 Integrates Widely throughout the Genome of the Human  
703 Blood Fluke *Schistosoma mansoni*. *PLoS Pathog* **12**, e1005931 (2016).  
704 <https://doi.org/10.1371/journal.ppat.1005931>
- 705 17 Berriman, M. *et al.* The genome of the blood fluke *Schistosoma mansoni*. *Nature* **460**,  
706 352-358 (2009). <https://doi.org/10.1038/nature08160>

- 707 18 Protasio, A. V. *et al.* A systematically improved high quality genome and transcriptome  
708 of the human blood fluke *Schistosoma mansoni*. *PLoS Negl Trop Dis* **6**, e1455 (2012).  
709 <https://doi.org/10.1371/journal.pntd.0001455>
- 710 19 Howe, K. L. *et al.* WormBase 2016: expanding to enable helminth genomic research.  
711 *Nucleic Acids Res* **44**, D774-780 (2016). <https://doi.org/10.1093/nar/gkv1217>
- 712 20 Howe, K. L., Bolt, B. J., Shafie, M., Kersey, P. & Berriman, M. WormBase ParaSite - a  
713 comprehensive resource for helminth genomics. *Mol Biochem Parasitol* **215**, 2-10  
714 (2017). <https://doi.org/10.1016/j.molbiopara.2016.11.005>
- 715 21 Luo, H. *et al.* DEG 15, an update of the Database of Essential Genes that includes built-in  
716 analysis tools. *Nucleic Acids Res* **49**, D677-D686 (2021).  
717 <https://doi.org/10.1093/nar/gkaa917>
- 718 22 Labun, K. *et al.* CHOPCHOP v3: expanding the CRISPR web toolbox beyond genome  
719 editing. *Nucleic Acids Res* **47**, W171-W174 (2019). <https://doi.org/10.1093/nar/gkz365>
- 720 23 Montague, T. G., Cruz, J. M., Gagnon, J. A., Church, G. M. & Valen, E. CHOPCHOP: a  
721 CRISPR/Cas9 and TALEN web tool for genome editing. *Nucleic Acids Res* **42**, W401-  
722 407 (2014). <https://doi.org/10.1093/nar/gku410>
- 723 24 Bloh, K. *et al.* Deconvolution of Complex DNA Repair (DECODR): Establishing a  
724 Novel Deconvolution Algorithm for Comprehensive Analysis of CRISPR-Edited Sanger  
725 Sequencing Data. *CRISPR J* **4**, 120-131 (2021). <https://doi.org/10.1089/crispr.2020.0022>
- 726 25 Marcek Chorvatova, A., Kirchnerova, J., Cagalinec, M., Mateasik, A. & Chorvat, D., Jr.  
727 Spectrally and spatially resolved laser-induced photobleaching of endogenous flavin  
728 fluorescence in cardiac myocytes. *Cytometry A* **95**, 13-23 (2019).  
729 <https://doi.org/10.1002/cyto.a.23591>
- 730 26 Clement, K. *et al.* CRISPResso2 provides accurate and rapid genome editing sequence  
731 analysis. *Nat Biotechnol* **37**, 224-226 (2019). <https://doi.org/10.1038/s41587-019-0032-3>
- 732 27 Pinello, L. *et al.* Analyzing CRISPR genome-editing experiments with CRISPResso. *Nat*  
733 *Biotechnol* **34**, 695-697 (2016). <https://doi.org/10.1038/nbt.3583>
- 734 28 Abudayyak, M., Jannuzzi, A. T., Ozhan, G. & Alpertunga, B. Investigation on the toxic  
735 potential of *Tribulus terrestris* in vitro. *Pharm Biol* **53**, 469-476 (2015).  
736 <https://doi.org/10.3109/13880209.2014.924019>
- 737 29 Rothe, C. *et al.* Developing Endemicity of Schistosomiasis, Corsica, France. *Emerg*  
738 *Infect Dis* **27** (2021). <https://doi.org/10.3201/eid2701.204391>
- 739 30 Hoffmann, K. F., Brindley, P. J. & Berriman, M. Medicine. Halting harmful helminths.  
740 *Science* **346**, 168-169 (2014). <https://doi.org/10.1126/science.1261139>
- 741 31 Cox, D. B., Platt, R. J. & Zhang, F. Therapeutic genome editing: prospects and  
742 challenges. *Nat Med* **21**, 121-131 (2015). <https://doi.org/10.1038/nm.3793>
- 743 32 Douglas, B. *et al.* Immune System Investigation Using Parasitic Helminths. *Annu Rev*  
744 *Immunol* **39**, 639-665 (2021). <https://doi.org/10.1146/annurev-immunol-093019-122827>
- 745 33 Pavani, G. & Amendola, M. Targeted Gene Delivery: Where to Land. *Front Genome Ed*  
746 **2**, 609650 (2021). <https://doi.org/10.3389/fgeed.2020.609650>
- 747 34 Xu, Y. Z. & Dresden, M. H. *Schistosoma mansoni*: egg morphology and hatchability. *J*  
748 *Parasitol* **75**, 481-483 (1989).
- 749 35 Katsumata, T., Shimada, M., Sato, K. & Aoki, Y. Possible involvement of calcium ions  
750 in the hatching of *Schistosoma mansoni* eggs in water. *J Parasitol* **74**, 1040-1041 (1988).
- 751 36 Kassim, O. & Gibertson, D. E. Hatching of *Schistosoma mansoni* eggs and observations  
752 on motility of miracidia. *J Parasitol* **62**, 715-720 (1976).

- 753 37 Gabriel, R., Schmidt, M. & von Kalle, C. Integration of retroviral vectors. *Curr Opin*  
754 *Immunol* **24**, 592-597 (2012). [https://doi.org:10.1016/j.coi.2012.08.006](https://doi.org/10.1016/j.coi.2012.08.006)
- 755 38 Mann, V. H., Suttiprapa, S., Skinner, D. E., Brindley, P. J. & Rinaldi, G. Pseudotyped  
756 murine leukemia virus for schistosome transgenesis: approaches, methods and  
757 perspectives. *Transgenic Res* **23**, 539-556 (2014). [https://doi.org:10.1007/s11248-013-](https://doi.org/10.1007/s11248-013-9779-3)  
758 [9779-3](https://doi.org/10.1007/s11248-013-9779-3)
- 759 39 Dai, F. *et al.* Sodium-bile acid co-transporter is crucial for survival of a carcinogenic liver  
760 fluke *Clonorchis sinensis* in the bile. *PLoS Negl Trop Dis* **14**, e0008952 (2020).  
761 [https://doi.org:10.1371/journal.pntd.0008952](https://doi.org/10.1371/journal.pntd.0008952)
- 762 40 Jurberg, A. D. *et al.* The embryonic development of *Schistosoma mansoni* eggs: proposal  
763 for a new staging system. *Dev Genes Evol* **219**, 219-234 (2009).  
764 [https://doi.org:10.1007/s00427-009-0285-9](https://doi.org/10.1007/s00427-009-0285-9)
- 765 41 Rinaldi, G. *et al.* Germline transgenesis and insertional mutagenesis in *Schistosoma*  
766 *mansoni* mediated by murine leukemia virus. *PLoS Pathog* **8**, e1002820 (2012).  
767 [https://doi.org:10.1371/journal.ppat.1002820](https://doi.org/10.1371/journal.ppat.1002820)
- 768 42 Farbiak, L. *et al.* All-In-One Dendrimer-Based Lipid Nanoparticles Enable Precise HDR-  
769 Mediated Gene Editing In Vivo. *Adv Mater* **33**, e2006619 (2021).  
770 [https://doi.org:10.1002/adma.202006619](https://doi.org/10.1002/adma.202006619)
- 771 43 Kazemian, P. *et al.* Lipid-Nanoparticle-Based Delivery of CRISPR/Cas9 Genome-  
772 Editing Components. *Mol Pharm* **19**, 1669-1686 (2022).  
773 [https://doi.org:10.1021/acs.molpharmaceut.1c00916](https://doi.org/10.1021/acs.molpharmaceut.1c00916)
- 774 44 Prakash, G. *et al.* Microfluidic fabrication of lipid nanoparticles for the delivery of  
775 nucleic acids. *Adv Drug Deliv Rev* **184**, 114197 (2022).  
776 [https://doi.org:10.1016/j.addr.2022.114197](https://doi.org/10.1016/j.addr.2022.114197)
- 777 45 Walther, J. *et al.* Impact of Formulation Conditions on Lipid Nanoparticle Characteristics  
778 and Functional Delivery of CRISPR RNP for Gene Knock-Out and Correction.  
779 *Pharmaceutics* **14** (2022). [https://doi.org:10.3390/pharmaceutics14010213](https://doi.org/10.3390/pharmaceutics14010213)
- 780 46 Yan, J., Kang, D. D. & Dong, Y. Harnessing lipid nanoparticles for efficient CRISPR  
781 delivery. *Biomater Sci* **9**, 6001-6011 (2021). [https://doi.org:10.1039/d1bm00537e](https://doi.org/10.1039/d1bm00537e)
- 782 47 Diez, B. *et al.* Therapeutic gene editing in CD34(+) hematopoietic progenitors from  
783 Fanconi anemia patients. *EMBO Mol Med* **9**, 1574-1588 (2017).  
784 [https://doi.org:10.15252/emmm.201707540](https://doi.org/10.15252/emmm.201707540)
- 785 48 Roquis, D. *et al.* Histone methylation changes are required for life cycle progression in  
786 the human parasite *Schistosoma mansoni*. *PLoS Pathog* **14**, e1007066 (2018).  
787 [https://doi.org:10.1371/journal.ppat.1007066](https://doi.org/10.1371/journal.ppat.1007066)
- 788 49 Smith, J. P. & Sheffield, N. C. Analytical Approaches for ATAC-seq Data Analysis. *Curr*  
789 *Protoc Hum Genet* **106**, e101 (2020). [https://doi.org:10.1002/cphg.101](https://doi.org/10.1002/cphg.101)
- 790 50 Taudt, A., Colome-Tatche, M. & Johannes, F. Genetic sources of population epigenomic  
791 variation. *Nat Rev Genet* **17**, 319-332 (2016). [https://doi.org:10.1038/nrg.2016.45](https://doi.org/10.1038/nrg.2016.45)
- 792 51 Suttiprapa, S., Rinaldi, G. & Brindley, P. Genetic manipulation of schistosomes -  
793 Progress with integration competent vectors. *Parasitology* **139**, 641-650 (2011).  
794 [https://doi.org:10.1017/S003118201100134X](https://doi.org/10.1017/S003118201100134X)
- 795 52 Pavani, G. & Amendola, M. Targeted Gene Delivery: Where to Land. *Front Genome Ed*  
796 **2**, 609650 (2020). [https://doi.org:10.3389/fgeed.2020.609650](https://doi.org/10.3389/fgeed.2020.609650)
- 797 53 Pavani, G. & Amendola, M. Corrigendum: Targeted Gene Delivery: Where to Land.  
798 *Front Genome Ed* **3**, 682171 (2021). [https://doi.org:10.3389/fgeed.2021.682171](https://doi.org/10.3389/fgeed.2021.682171)

- 799 54 Cortes, M. F. *et al.* Community-acquired methicillin-resistant *Staphylococcus aureus*  
800 from ST1 lineage harboring a new SCCmec IV subtype (SCCmec IVm) containing the  
801 tetK gene. *Infect Drug Resist* **11**, 2583-2592 (2018).  
802 <https://doi.org/10.2147/IDR.S175079>
- 803 55 Mann, V. H., Morales, M. E., Rinaldi, G. & Brindley, P. J. Culture for genetic  
804 manipulation of developmental stages of *Schistosoma mansoni*. *Parasitology* **137**, 451-  
805 462 (2010). <https://doi.org/10.1017/S0031182009991211>
- 806 56 Dalton, J. P., Day, S. R., Drew, A. C. & Brindley, P. J. A method for the isolation of  
807 schistosome eggs and miracidia free of contaminating host tissues. *Parasitology* **115** ( Pt  
808 **1**), 29-32 (1997). <https://doi.org/10.1017/s0031182097001091>
- 809 57 Labun, K., Montague, T. G., Gagnon, J. A., Thyme, S. B. & Valen, E. CHOPCHOP v2: a  
810 web tool for the next generation of CRISPR genome engineering. *Nucleic Acids Res* **44**,  
811 W272-276 (2016). <https://doi.org/10.1093/nar/gkw398>
- 812 58 Hulme, B. J. *et al.* *Schistosoma mansoni* alpha-N-acetylgalactosaminidase (SmNAGAL)  
813 regulates coordinated parasite movement and egg production. *PLoS Pathog* **18**, e1009828  
814 (2022). <https://doi.org/10.1371/journal.ppat.1009828>
- 815 59 Wilfinger, W. W., Mackey, K. & Chomczynski, P. Effect of pH and ionic strength on the  
816 spectrophotometric assessment of nucleic acid purity. *Biotechniques* **22**, 474-476, 478-  
817 481 (1997). <https://doi.org/10.2144/97223st01>
- 818 60 Domingo, M., Mais, R. F., Weiskopf, R. & Fink, S. Detection of schistosome ova by dark  
819 field fluorescence microscopy. *Gastroenterology* **54**, 884-886 (1968).
- 820 61 Lu, Z. *et al.* Isolation, enrichment and primary characterisation of vitelline cells from  
821 *Schistosoma mansoni* obtained by the organ isolation method. *Int J Parasitol* **45**, 663-672  
822 (2015). <https://doi.org/10.1016/j.ijpara.2015.04.002>
- 823 62 Collins, J. J., 3rd, King, R. S., Cogswell, A., Williams, D. L. & Newmark, P. A. An atlas  
824 for *Schistosoma mansoni* organs and life-cycle stages using cell type-specific markers  
825 and confocal microscopy. *PLoS Negl Trop Dis* **5**, e1009 (2011).  
826 <https://doi.org/10.1371/journal.pntd.0001009>
- 827 63 Wu, Q., Feng, Z. & Hu, W. Reduction of autofluorescence in whole adult worms of  
828 *Schistosoma japonicum* for immunofluorescence assay. *Parasit Vectors* **14**, 532 (2021).  
829 <https://doi.org/10.1186/s13071-021-05027-3>



**a** Chromosome 3 window

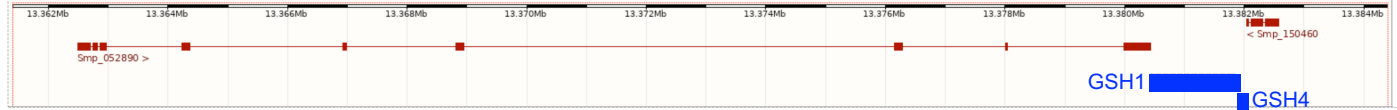

Chromosome 2 windows

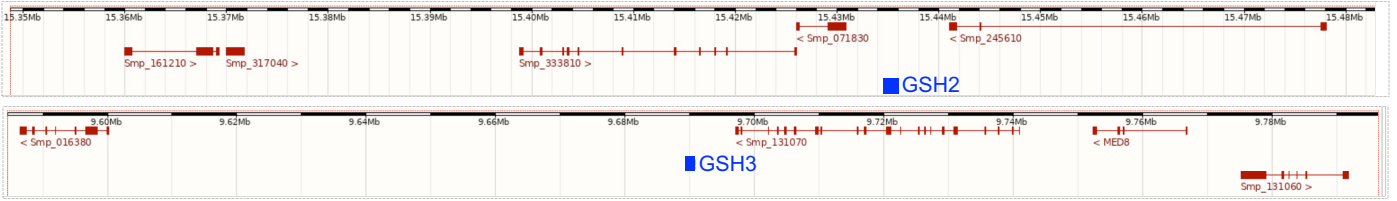

**b**

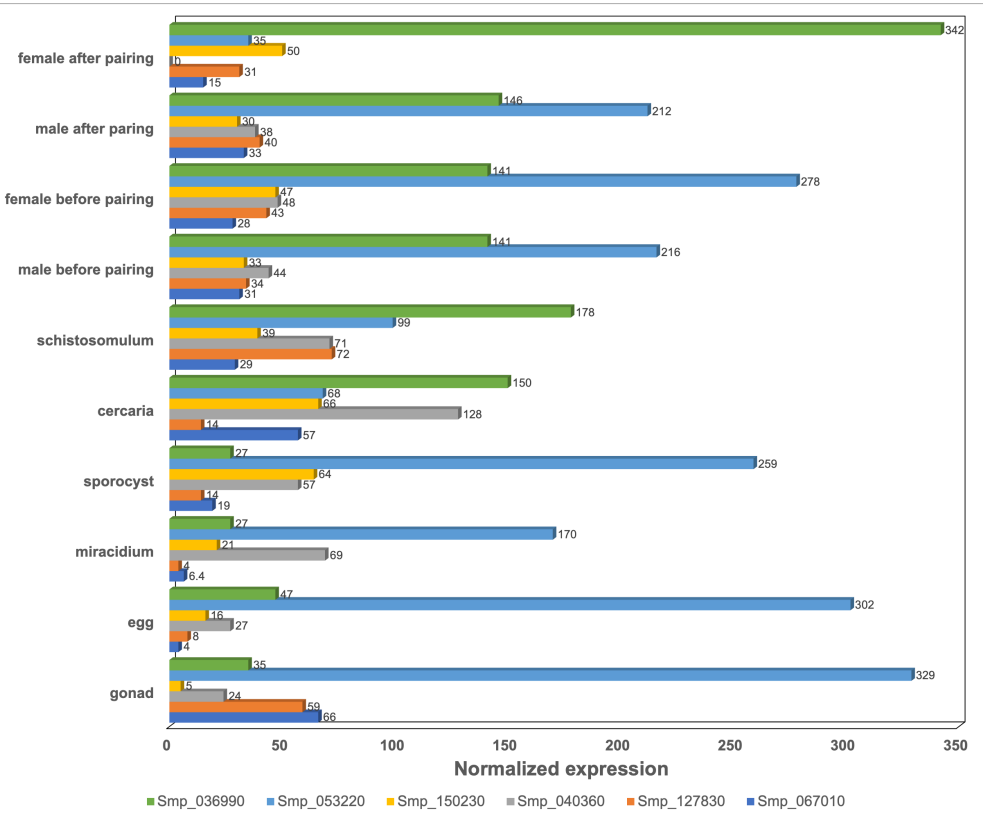

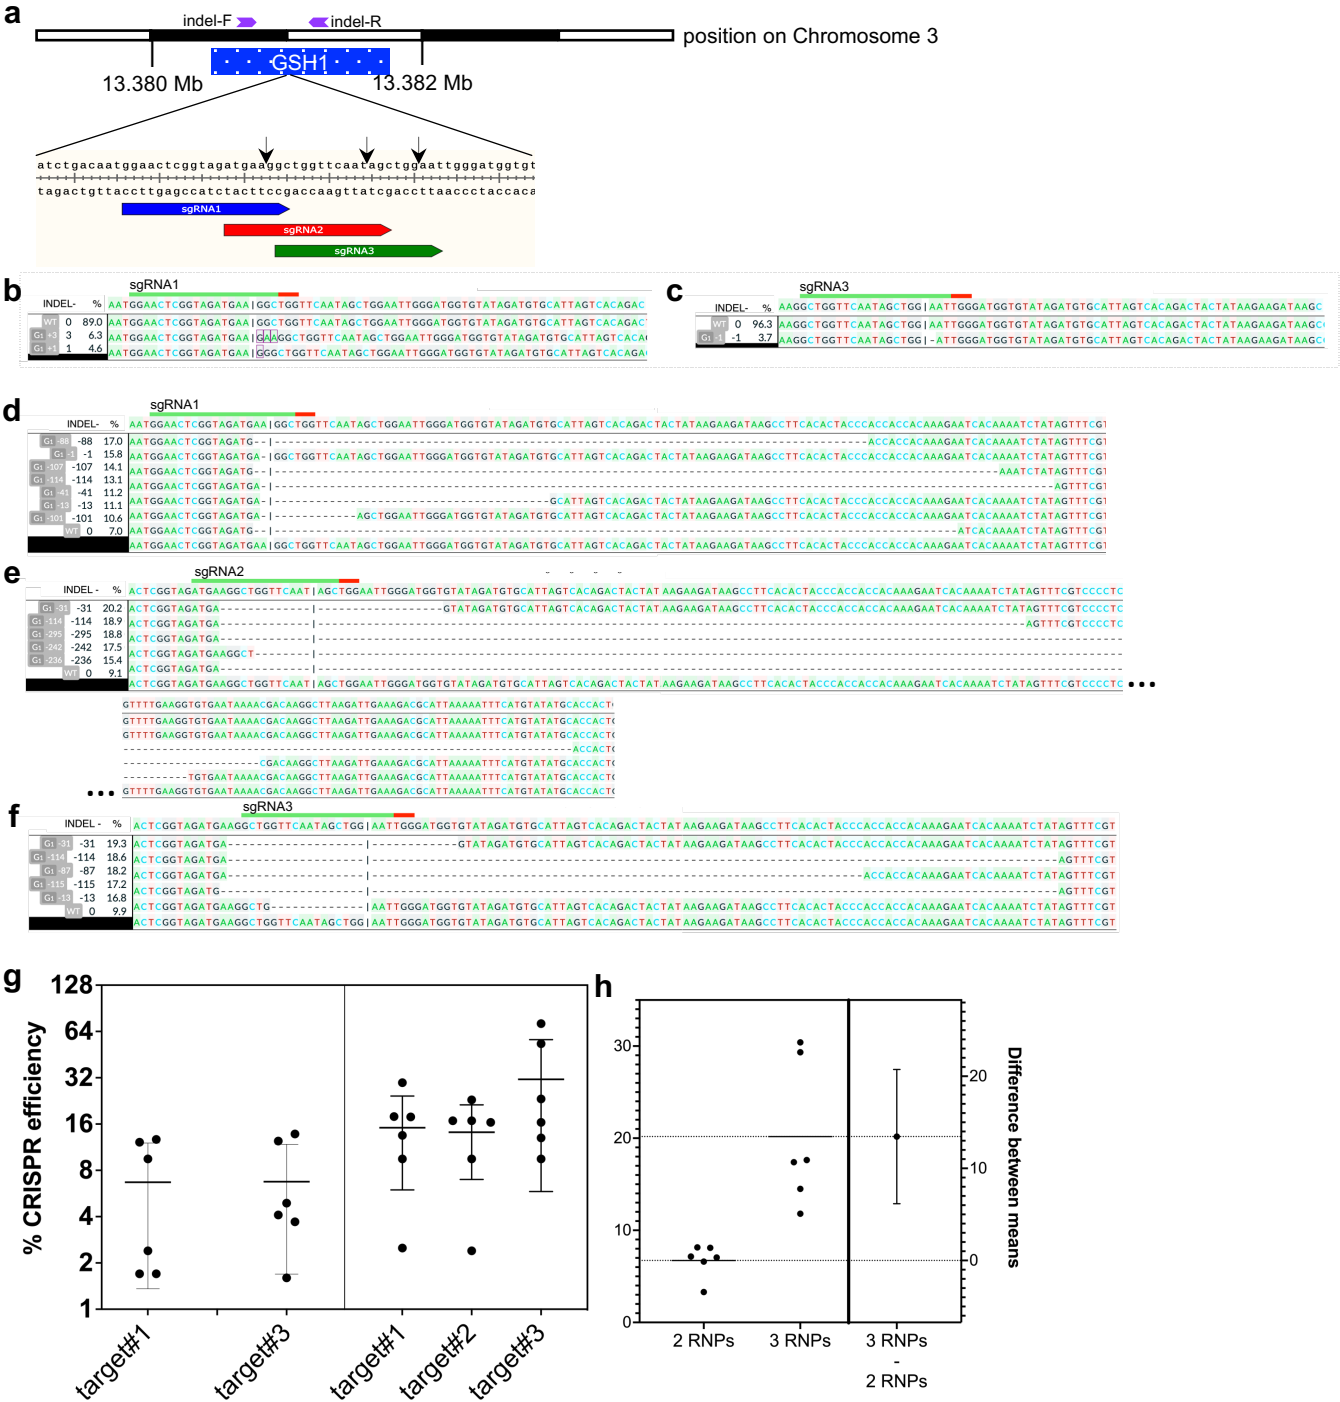

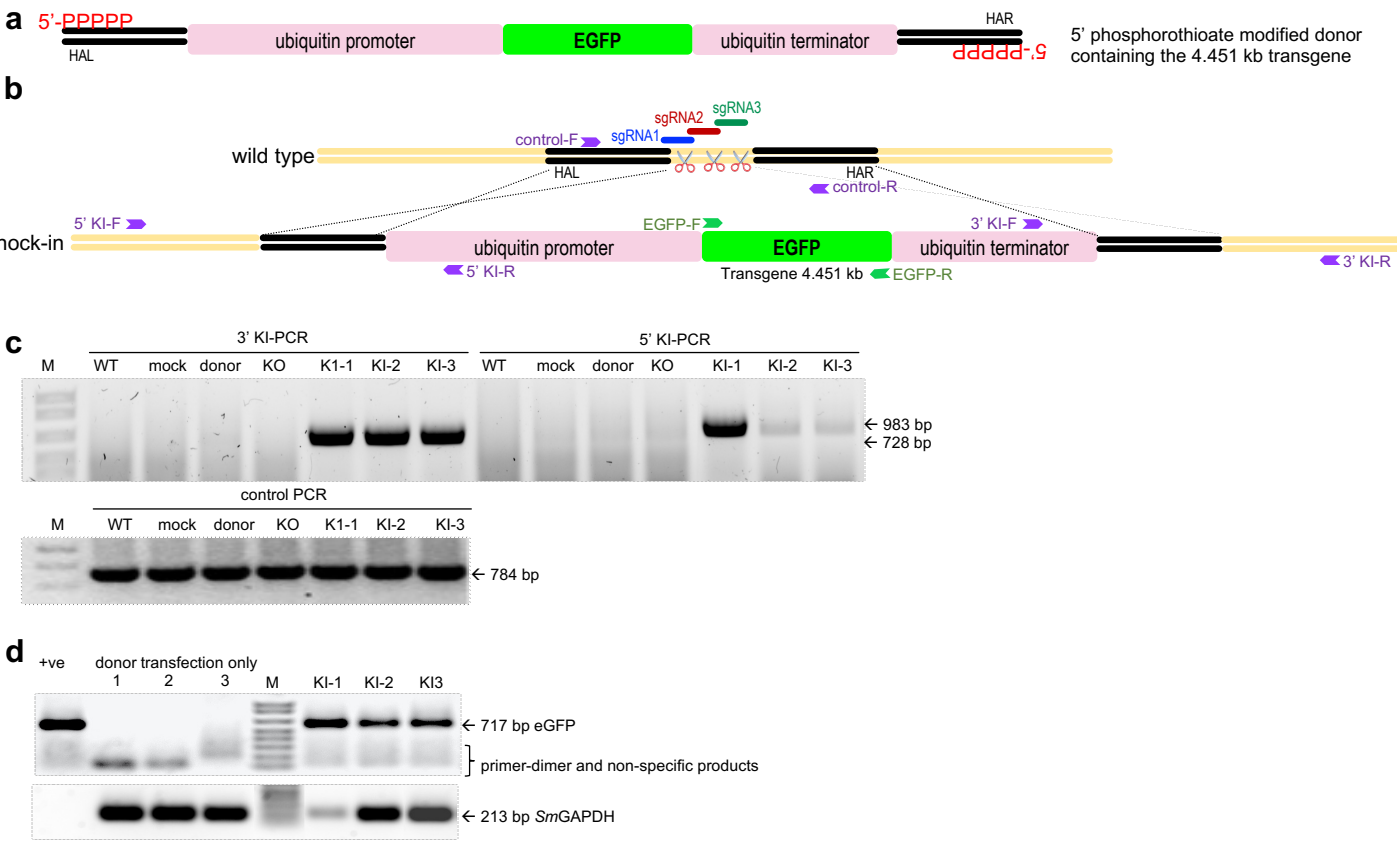

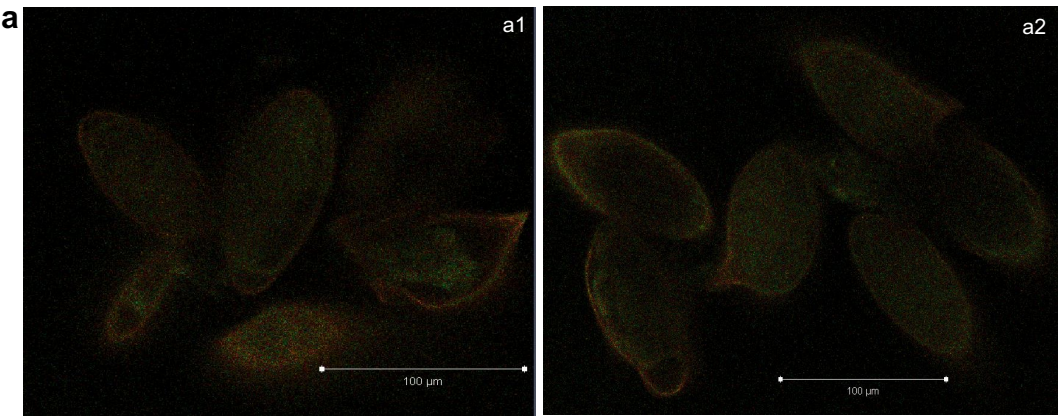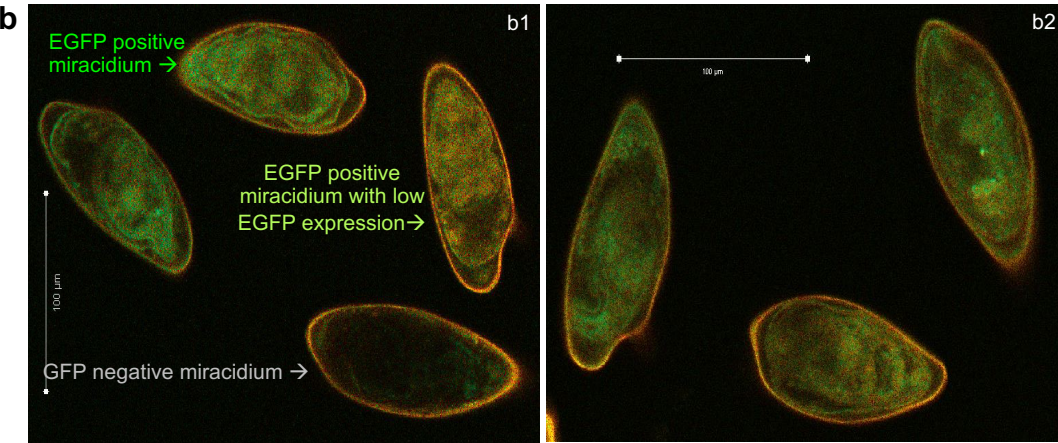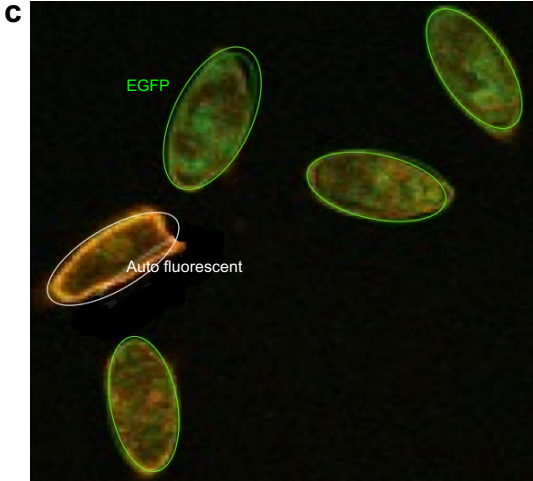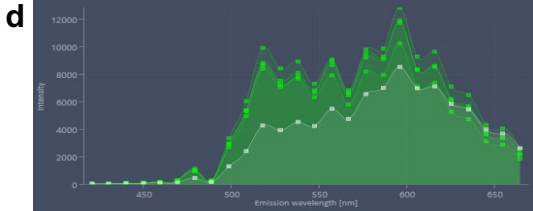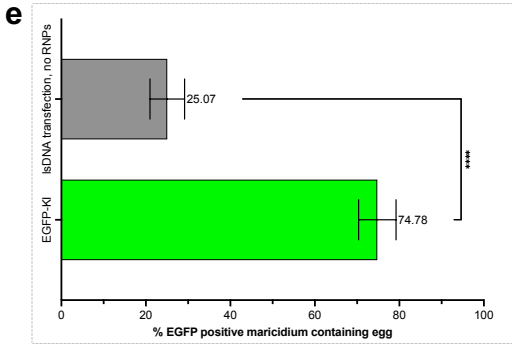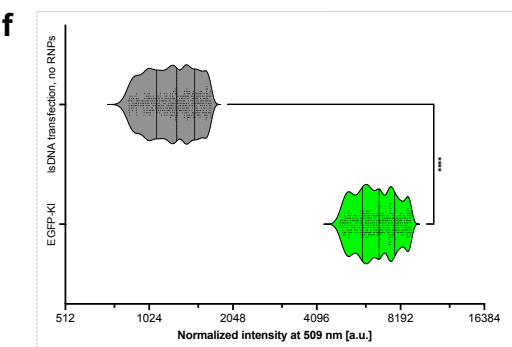

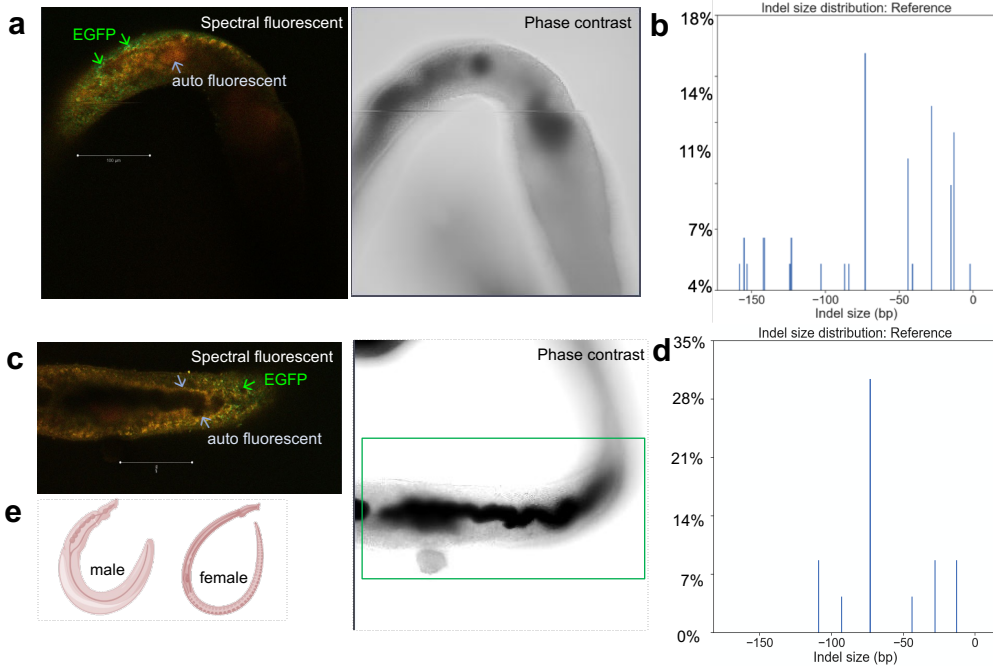



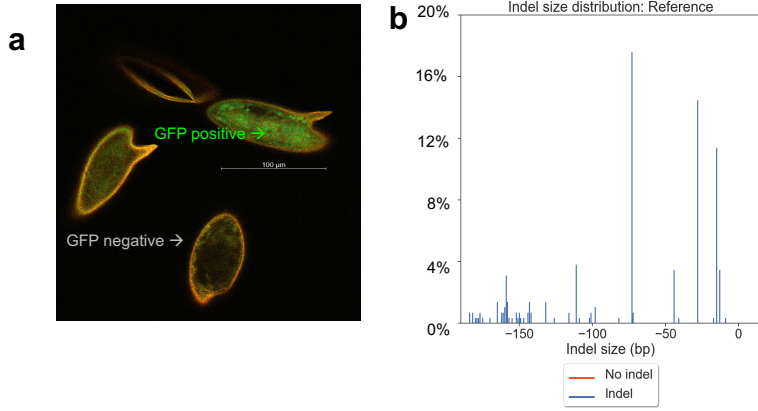

**Table 1.** A Table shows GSH criteria and rationale to computationally predict GSH sites in the *S. mansoni* genome. Candidate GSH sites indicating the chromosome locations and lengths of six candidate intragenic GSH sites and four candidate intergenic GSH sites.

| GSH criteria                                                                                                           | Predicted <i>S. mansoni</i> GSH                                                  |                                                                                                                                                                      |                                                                                                                                                                                        |
|------------------------------------------------------------------------------------------------------------------------|----------------------------------------------------------------------------------|----------------------------------------------------------------------------------------------------------------------------------------------------------------------|----------------------------------------------------------------------------------------------------------------------------------------------------------------------------------------|
|                                                                                                                        | Accession no.                                                                    | Protein coding                                                                                                                                                       | Location on the genome                                                                                                                                                                 |
| <b><i>Intragenic GSH</i></b>                                                                                           |                                                                                  |                                                                                                                                                                      |                                                                                                                                                                                        |
| 1) Close to peaks of H3H4me3, a histone modification that is associated with euchromatin and transcription start sites | <ul style="list-style-type: none"> <li>Smp_053220</li> <li>Smp_150230</li> </ul> | <ul style="list-style-type: none"> <li>aldo keto reductase family, member B4</li> <li>metal tolerance protein C3</li> </ul>                                          | <ul style="list-style-type: none"> <li>Chromosome 4: 1,244,090-1,260,835 forward strand (16.745 Kb)</li> <li>Chromosome 3: 27,720,233-27,752,200 forward strand (31.967 Kb)</li> </ul> |
| 2) Do not contain H3K27me3, a histone modification that is associated with heterochromatin in any of the life stages   | <ul style="list-style-type: none"> <li>Smp_040360</li> <li>Smp_127830</li> </ul> | <ul style="list-style-type: none"> <li>endoplasmic reticulum Golgi intermedia</li> <li>actin protein ARP2:3 complex subunit</li> </ul>                               | <ul style="list-style-type: none"> <li>Chromosome 1:76,379,080-76,396,355 forward strand (17.275 Kb)</li> <li>Chromosome 7:5,605,098-5,634,189 reverse strand (29.091 Kb)</li> </ul>   |
| 3) Deliver an ATAC-seq signal                                                                                          | <ul style="list-style-type: none"> <li>Smp_067010</li> </ul>                     | <ul style="list-style-type: none"> <li>RUN domain containing protein 1</li> </ul>                                                                                    | <ul style="list-style-type: none"> <li>Chromosome 4:22,148,377-22,197,632 reverse strand (49.255 Kb)</li> </ul>                                                                        |
| 4) Possibility for viral integration site as in human cell line shown preferentially into euchromatin                  | <ul style="list-style-type: none"> <li>Smp_036990</li> </ul>                     | <ul style="list-style-type: none"> <li>endophilin III</li> </ul>                                                                                                     | <ul style="list-style-type: none"> <li>Chromosome 4:4,502,471-4,557,287 reverse strand (54.816 Kb)</li> </ul>                                                                          |
| <b><i>Intergenic GSH</i></b>                                                                                           |                                                                                  |                                                                                                                                                                      |                                                                                                                                                                                        |
| 1) Unique sequences                                                                                                    | GSH1                                                                             | <ul style="list-style-type: none"> <li>n/a; Smp_052890</li> <li>copper transport protein atox1-related; Smp_150460</li> </ul>                                        | <ul style="list-style-type: none"> <li>Chromosome 3:13380432-13381848 (1,416 bp)</li> </ul>                                                                                            |
| 2) Locate outside annotated genes and long non-coding RNA                                                              | GSH2                                                                             | <ul style="list-style-type: none"> <li>6-phosphogluconate dehydrogenase; Smp_33810</li> <li>n/a; Smp_071830, Smp_245610</li> </ul>                                   | <ul style="list-style-type: none"> <li>Chromosome 2:15434976-15435945 (970 bp)</li> </ul>                                                                                              |
| 3) Locate outside putative promotor regions where more than 2Kb upstream of the TTS                                    | GSH3                                                                             | <ul style="list-style-type: none"> <li>cytohesin-related guanine nucleotide-exchange protein; Smp_016380</li> <li>condensin complex subunit 1; Smp_131070</li> </ul> | <ul style="list-style-type: none"> <li>Chromosome 2:9689988-9690739 (752 bp)</li> </ul>                                                                                                |
| 4) Close to peaks of H3K4me3 in all parasite stages                                                                    | GSH4                                                                             | <ul style="list-style-type: none"> <li>cytohesin-related guanine nucleotide-exchange protein; Smp_016380</li> <li>condensin complex subunit 1; Smp_131070</li> </ul> | <ul style="list-style-type: none"> <li>Chromosome 3:13381901-13382038 (138 bp)</li> </ul>                                                                                              |
| 5) Do not contain h3K27me3                                                                                             |                                                                                  |                                                                                                                                                                      |                                                                                                                                                                                        |
| 6) Overlapping ATAC-sequence positive sites                                                                            | GSH4                                                                             | <ul style="list-style-type: none"> <li>Smp_052890, Smp_150460</li> </ul>                                                                                             |                                                                                                                                                                                        |
| 7) Within 11 Kb of HIV integration site                                                                                |                                                                                  |                                                                                                                                                                      |                                                                                                                                                                                        |
